# Supplementary material for: Proteotyping bacteria: Characterization, differentiation and identification of pneumococcus and other species within the Mitis Group of the genus Streptococcus by tandem mass spectrometry proteomics
Source: PubMed Central journal article supplement (PMC6287849; doi:10.1371/journal.pone.0208804), 2018-12-10
Supplement: pone.0208804.s001.pdf [file pone.0208804.s001.pdf]

**S1 Table. Mitis group genomes included in the Initial Database**

| <b>Organism</b>                       | <b>Strain</b> | <b>GenBank Accession number</b> |
|---------------------------------------|---------------|---------------------------------|
| <i>Streptococcus gordonii</i>         | CH1           | NC_009785.1                     |
| <i>Streptococcus mitis</i>            | B6            | NC_013853.1                     |
| <i>Streptococcus oligofermentans</i>  | AS 1.3089     | NC_021175.1                     |
| <i>Streptococcus oralis</i>           | Uo5           | NC_015291.1                     |
| <i>Streptococcus parasanguinis</i>    | ATCC 15912 T  | NC_015678.1                     |
| <i>Streptococcus parasanguinis</i>    | FW213         | NC_017905.1                     |
| <i>Streptococcus pneumoniae</i>       | 70585         | NC_012468.1                     |
| <i>Streptococcus pneumoniae</i>       | 670-6B        | NC_014498.1                     |
| <i>Streptococcus pneumoniae</i>       | A026          | NC_022655.1                     |
| <i>Streptococcus pneumoniae</i>       | AP200         | NC_014494.1                     |
| <i>Streptococcus pneumoniae</i>       | ATCC 700669   | NC_011900.1                     |
| <i>Streptococcus pneumoniae</i>       | CGSP14        | NC_010582.1                     |
| <i>Streptococcus pneumoniae</i>       | D39           | NC_008533.1                     |
| <i>Streptococcus pneumoniae</i>       | G54           | NC_011072.1                     |
| <i>Streptococcus pneumoniae</i>       | gamPNI0373    | NC_018630.1                     |
| <i>Streptococcus pneumoniae</i>       | Hungary19A    | NC_010380.1                     |
| <i>Streptococcus pneumoniae</i>       | INV104        | NC_017591.1                     |
| <i>Streptococcus pneumoniae</i>       | INV200        | NC_017593.1                     |
| <i>Streptococcus pneumoniae</i>       | JJA           | NC_012466.1                     |
| <i>Streptococcus pneumoniae</i>       | OXC141        | NC_017592.1                     |
| <i>Streptococcus pneumoniae</i>       | P1031         | NC_012467.1                     |
| <i>Streptococcus pneumoniae</i>       | R6            | NC_003098.1                     |
| <i>Streptococcus pneumoniae</i>       | SPN032672     | NC_021003.1                     |
| <i>Streptococcus pneumoniae</i>       | SPN033038     | NC_021004.1                     |
| <i>Streptococcus pneumoniae</i>       | SPN034156     | NC_021006.1                     |
| <i>Streptococcus pneumoniae</i>       | SPN034183     | NC_021028.1                     |
| <i>Streptococcus pneumoniae</i>       | SPN994038     | NC_021026.1                     |
| <i>Streptococcus pneumoniae</i>       | SPN994039     | NC_021005.1                     |
| <i>Streptococcus pneumoniae</i>       | SPNA45        | NC_018594.1                     |
| <i>Streptococcus pneumoniae</i>       | ST556         | NC_017769.2                     |
| <i>Streptococcus pneumoniae</i>       | Taiwan19F     | NC_012469.1                     |
| <i>Streptococcus pneumoniae</i>       | TCH8431       | NC_014251.1                     |
| <i>Streptococcus pneumoniae</i>       | TIGR4         | NC_003028.3                     |
| <i>Streptococcus pseudopneumoniae</i> | IS7493        | NC_015875.1                     |
| <i>Streptococcus sanguinis</i>        | SK36          | NC_009009.1                     |
