# Supplementary material for: Proteotyping bacteria: Characterization, differentiation and identification of pneumococcus and other species within the Mitis Group of the genus Streptococcus by tandem mass spectrometry proteomics
Source: PubMed Central journal article supplement (PMC6287849; doi:10.1371/journal.pone.0208804), 2018-12-10
Supplement: pone.0208804.s002.pdf [file pone.0208804.s002.pdf]

**S2 Table. Mitis group genomes included in the Curated Database**

| <b>No.</b> | <b>Organism</b>                       | <b>Strain</b>           | <b>GenBank accession number</b> |
|------------|---------------------------------------|-------------------------|---------------------------------|
| 1          | <i>Streptococcus pseudopneumoniae</i> | IS7493                  | NC_015875.1                     |
| 2          | <i>Streptococcus pseudopneumoniae</i> | ATCC BAA-960T           | NZ_AICS00000000.1               |
| 3          | <i>Streptococcus pseudopneumoniae</i> | 1321                    | NZ_AYRP00000000.1               |
| 4          | <i>Streptococcus pseudopneumoniae</i> | 276-03                  | NZ_LJHJ00000000.1               |
| 5          | <i>Streptococcus pseudopneumoniae</i> | 338-14                  | NZ_LJHI00000000.1               |
| 6          | <i>Streptococcus pseudopneumoniae</i> | 61-14                   | NZ_LJHK00000000.1               |
| 7          | <i>Streptococcus pneumoniae</i>       | R6                      | NC_003098.1                     |
| 8          | <i>Streptococcus pneumoniae</i>       | D39                     | NC_008533.1                     |
| 9          | <i>Streptococcus pneumoniae</i>       | 70585                   | NC_012468.1                     |
| 10         | <i>Streptococcus pneumoniae</i>       | JJA                     | NC_012466.1                     |
| 11         | <i>Streptococcus pneumoniae</i>       | P1031                   | NC_012467.1                     |
| 12         | <i>Streptococcus pneumoniae</i>       | Taiwan19F-14            | NC_012469.1                     |
| 13         | <i>Streptococcus pneumoniae</i>       | Hungary19A-6            | NC_010380.1                     |
| 14         | <i>Streptococcus pneumoniae</i>       | G54                     | NC_011072.1                     |
| 15         | <i>Streptococcus pneumoniae</i>       | CGSP14                  | NC_010582.1                     |
| 16         | <i>Streptococcus pneumoniae</i>       | ATCC 700669             | NC_011900.1                     |
| 17         | <i>Streptococcus pneumoniae</i>       | AP200                   | NC_014494.1                     |
| 18         | <i>Streptococcus pneumoniae</i>       | 670-6B                  | NC_014498.1                     |
| 19         | <i>Streptococcus pneumoniae</i>       | SPNA45                  | NC_018594.1                     |
| 20         | <i>Streptococcus pneumoniae</i>       | TCH8431/19A             | NC_014251.1                     |
| 21         | <i>Streptococcus pneumoniae</i>       | INV200                  | NC_017593.1                     |
| 22         | <i>Streptococcus pneumoniae</i>       | OXC141                  | NC_017592.1                     |
| 23         | <i>Streptococcus pneumoniae</i>       | INV104                  | NC_017591.1                     |
| 24         | <i>Streptococcus pneumoniae</i>       | SPN034156               | NC_021006.1                     |
| 25         | <i>Streptococcus pneumoniae</i>       | SPN034183               | NC_021028.1                     |
| 26         | <i>Streptococcus pneumoniae</i>       | SPN994038               | NC_021026.1                     |
| 27         | <i>Streptococcus pneumoniae</i>       | SPN994039               | NC_021005.1                     |
| 28         | <i>Streptococcus pneumoniae</i>       | SPN032672               | NC_021003.1                     |
| 29         | <i>Streptococcus pneumoniae</i>       | SPN033038               | NC_021004.1                     |
| 30         | <i>Streptococcus pneumoniae</i>       | ST556                   | NC_017769.2                     |
| 31         | <i>Streptococcus pneumoniae</i>       | TIGR4 (Tettelin, 2001)  | NC_003028.3                     |
| 32         | <i>Streptococcus pneumoniae</i>       | TIGR4 (Ribeiro, 2012)   | NZ_AKVV00000000.1               |
| 33         | <i>Streptococcus pneumoniae</i>       | gamPNI0373              | NC_018630.1                     |
| 34         | <i>Streptococcus pneumoniae</i>       | PCS8235                 | NZ_CM001835.1                   |
| 35         | <i>Streptococcus pneumoniae</i>       | NT_110_58               | NZ_CP007593.1                   |
| 36         | <i>Streptococcus pneumoniae</i>       | A66                     | NZ_LN847353.1                   |
| 37         | <i>Streptococcus pneumoniae</i>       | NCTC7465T               | NZ_LN831051.1                   |
| 38         | <i>Streptococcus mitis</i>            | B6                      | NC_013853.1                     |
| 39         | <i>Streptococcus mitis</i>            | KCOM 1350 (= ChDC B183) | NZ_CP012646.1                   |
| 40         | <i>Streptococcus mitis</i>            | SVGS_061                | NZ_CP014326.1                   |
| 41         | <i>Streptococcus mitis</i>            | NCTC 12261T             | NZ_AEDX00000000.1               |
| 42         | <i>Streptococcus mitis</i>            | 1111_SMIT               | NZ_JWCV00000000.1               |
| 43         | <i>Streptococcus mitis</i>            | 11-5                    | NZ_AQTT00000000.1               |
| 44         | <i>Streptococcus mitis</i>            | 13/39                   | NZ_AQTU00000000.1               |
| 45         | <i>Streptococcus mitis</i>            | 17/34                   | NZ_ASZZ00000000.1               |
| 46         | <i>Streptococcus mitis</i>            | 18/56                   | NZ_ATAA00000000.1               |
| 47         | <i>Streptococcus mitis</i>            | 21/39                   | NZ_AYRR00000000.1               |
| 48         | <i>Streptococcus mitis</i>            | 850_SMIT                | NZ_JUQO00000000.1               |

|    |                                      |                         |                   |
|----|--------------------------------------|-------------------------|-------------------|
| 49 | <i>Streptococcus mitis</i>           | OT25                    | NZ_JYGP00000000.1 |
| 50 | <i>Streptococcus mitis</i>           | SK1073                  | NZ_AFQT00000000.1 |
| 51 | <i>Streptococcus mitis</i>           | SK1080                  | NZ_AFQV00000000.1 |
| 52 | <i>Streptococcus mitis</i>           | SK1126                  | NZ_JPFT00000000.1 |
| 53 | <i>Streptococcus mitis</i>           | SK137                   | NZ_JPFS00000000.1 |
| 54 | <i>Streptococcus mitis</i>           | SK145                   | NZ_JYGS00000000.1 |
| 55 | <i>Streptococcus mitis</i>           | SK321                   | NZ_AEDT00000000.1 |
| 56 | <i>Streptococcus mitis</i>           | SK564                   | NZ_AEDU00000000.1 |
| 57 | <i>Streptococcus mitis</i>           | SK569                   | NZ_AFUF00000000.1 |
| 58 | <i>Streptococcus mitis</i>           | SK575                   | NZ_AICU00000000.1 |
| 59 | <i>Streptococcus mitis</i>           | SK578                   | NZ_JPFY00000000.1 |
| 60 | <i>Streptococcus mitis</i>           | SK579                   | NZ_AJL00000000.1  |
| 61 | <i>Streptococcus mitis</i>           | SK597                   | NZ_AEDV00000000.1 |
| 62 | <i>Streptococcus mitis</i>           | SK608                   | NZ_JPFZ00000000.1 |
| 63 | <i>Streptococcus mitis</i>           | SK616                   | NZ_AICR00000000.1 |
| 64 | <i>Streptococcus mitis</i>           | SK629                   | NZ_JPFU00000000.1 |
| 65 | <i>Streptococcus mitis</i>           | SK637                   | NZ_JPFX00000000.1 |
| 66 | <i>Streptococcus mitis</i>           | SK642                   | NZ_JPFW00000000.1 |
| 67 | <i>Streptococcus mitis</i>           | SK667                   | NZ_JPFV00000000.1 |
| 68 | <i>Streptococcus oralis</i>          | 1314_SORA               | NZ_JVUD00000000.1 |
| 69 | <i>Streptococcus oralis</i>          | 727_SORA                | NZ_JUVM00000000.1 |
| 70 | <i>Streptococcus oralis</i>          | 734_SORA                | NZ_JUVF00000000.1 |
| 71 | <i>Streptococcus oralis</i>          | 918_SORA                | NZ_JUNW00000000.1 |
| 72 | <i>Streptococcus oralis</i>          | ATCC 35037T             | NZ_ADMV00000000.1 |
| 73 | <i>Streptococcus oralis</i>          | ATCC 49296              | NZ_AEPO00000000.1 |
| 74 | <i>Streptococcus oralis</i>          | SK10                    | NZ_AJKO00000000.1 |
| 75 | <i>Streptococcus oralis</i>          | SK100                   | NZ_AJKP00000000.1 |
| 76 | <i>Streptococcus oralis</i>          | SK141                   | NZ_JPGA00000000.1 |
| 77 | <i>Streptococcus oralis</i>          | SK143                   | NZ_JPGB00000000.1 |
| 78 | <i>Streptococcus oralis</i>          | SK610                   | NZ_AJKQ00000000.1 |
| 79 | <i>Streptococcus oralis</i>          | Uo5                     | NC_015291.1       |
| 80 | <i>Streptococcus oralis</i>          | AZ_3a                   | NZ_AORU00000000.1 |
| 81 | <i>Streptococcus oralis</i>          | 1366                    | NZ_AORX00000000.1 |
| 82 | <i>Streptococcus oralis</i>          | 2425                    | NZ_ASWZ00000000.1 |
| 83 | <i>Streptococcus oralis</i>          | 2426                    | NZ_ASXA00000000.1 |
| 84 | <i>Streptococcus oralis</i>          | CCUG 35754              | NZ_LWCE00000000.1 |
| 85 | <i>Streptococcus australis</i>       | ATCC 700641T            | NZ_AEQR00000000.1 |
| 86 | <i>Streptococcus cristatus</i>       | ATCC 51100T             | NZ_AEVC00000000.1 |
| 87 | <i>Streptococcus gordonii</i>        | CCUG 33482T             | LQWV00000000.1    |
| 88 | <i>Streptococcus gordonii</i>        | KCOM 1506 (= ChDC B679) | NZ_CP012648.1     |
| 89 | <i>Streptococcus gordonii</i>        | CH1                     | NC_009785.1       |
| 90 | <i>Streptococcus infantis</i>        | ATCC 700779T            | NZ_AEVD00000000.1 |
| 91 | <i>Streptococcus oligofermentans</i> | AS 1.3089T              | NC_021175.1       |
| 92 | <i>Streptococcus parasanguinis</i>   | ATCC 15912T             | NC_015678.1       |
| 93 | <i>Streptococcus parasanguinis</i>   | F0449                   | NZ_AJMV00000000.1 |
| 94 | <i>Streptococcus parasanguinis</i>   | FW213                   | NC_017905.1       |
| 95 | <i>Streptococcus peroris</i>         | ATCC 700780             | NZ_AEVF00000000.1 |
| 96 | <i>Streptococcus sanguinis</i>       | CC94A                   | NZ_AZJC00000000.1 |
| 97 | <i>Streptococcus sanguinis</i>       | SK1058                  | NZ_AFBF00000000.1 |
| 98 | <i>Streptococcus sanguinis</i>       | SK36                    | NC_009009.1       |

|     |                                |       |                   |
|-----|--------------------------------|-------|-------------------|
| 99  | <i>Streptococcus sanguinis</i> | SK405 | NZ_AEWZ00000000.1 |
| 100 | <i>Streptococcus sanguinis</i> | SK408 | NZ_AFBEO0000000.1 |
| 101 | <i>Streptococcus sanguinis</i> | SK678 | NZ_AEXA00000000.1 |
| 102 | <i>Streptococcus sinensis</i>  | HKU4T | NZ_JPEN00000000.1 |
