# Supplementary material for: Proteotyping bacteria: Characterization, differentiation and identification of pneumococcus and other species within the Mitis Group of the genus Streptococcus by tandem mass spectrometry proteomics
Source: PubMed Central journal article supplement (PMC6287849; doi:10.1371/journal.pone.0208804), 2018-12-10
Supplement: pone.0208804.s003.pdf [file pone.0208804.s003.pdf]

**S3 Table. Information about the twelve strains used as proteotyping model system**

**CLINICAL DATA**

| Strain             | Organism                   | Isolation source           | Place              | Date of isolation |
|--------------------|----------------------------|----------------------------|--------------------|-------------------|
| CCUG 4207T         | <i>S. pyogenes</i>         | Patient with scarlet fever | Manchester, UK     | Before 1926       |
| CCUG 25570         | <i>S. pyogenes</i>         | Human                      | Halmstad, Sweden   | 1985              |
| CCUG 47803         | <i>S. pyogenes</i>         | Human infected wound       | Unknown            | Unknown           |
| CCUG 49455T        | <i>S. pseudopneumoniae</i> | Human sputum               | Halifax, Canada    | 2002              |
| CCUG 63747         | <i>S. pseudopneumoniae</i> | Human                      | Boråas, Sweden     | 2013              |
| CCUG 62647         | <i>S. pseudopneumoniae</i> | Human pharynx              | Aarhus, Denmark    | 2000              |
| CCUG 31611T        | <i>S. mitis</i>            | Human oral cavity          | Sweden             | Unknown           |
| CCUG 63687         | <i>S. mitis</i>            | Human blood                | Jönköping, Sweden  | 2012              |
| CCUG 69183 = SK271 | <i>S. mitis</i>            | Human mouth                | Denmark            | 2014-10           |
| CCUG 28588T        | <i>S. pneumoniae</i>       | Unknown                    | New York, NY, USA  | 1948              |
| CCUG 7206          | <i>S. pneumoniae</i>       | Human blood                | Gothenburg, Sweden | 1978              |
| CCUG 35180         | <i>S. pneumoniae</i>       | Human blood                | Gothenburg, Sweden | 1995              |

**GENOMIC DATA**

| Strain             | Organism                   | Accession no.   | DNA extraction method | Illumina       | Assembly                    |
|--------------------|----------------------------|-----------------|-----------------------|----------------|-----------------------------|
| CCUG 4207T         | <i>S. pyogenes</i>         | MLGC00000000.1  | Promega               | HiSeq 2500     | CLC Genomic Workbench 9.5.1 |
| CCUG 25570         | <i>S. pyogenes</i>         | LNPL00000000.1  | Promega               | HiSeq 2500     | CLC Genomic Workbench 8.0.1 |
| CCUG 47803         | <i>S. pyogenes</i>         | MUYPO00000000.1 | Marmur procedure      | MiSeq          | CLC Genomic Workbench 9.5.1 |
| CCUG 49455T        | <i>S. pseudopneumoniae</i> | MWSM00000000.1  | Magna Pure Compact    | MiSeq          | CLC Genomic Workbench 10.0  |
| CCUG 63747         | <i>S. pseudopneumoniae</i> | MUXR00000000.1  | Magna Pure Compact    | MiSeq          | CLC Genomic Workbench 9.5.1 |
| CCUG 62647         | <i>S. pseudopneumoniae</i> | MUXQ00000000.1  | Magna Pure Compact    | MiSeq          | CLC Genomic Workbench 9.5.1 |
| CCUG 31611T        | <i>S. mitis</i>            | MUYN00000000.1  | Magna Pure Compact    | MiSeq          | CLC Genomic Workbench 9.5.1 |
| CCUG 63687         | <i>S. mitis</i>            | MUYO00000000.1  | Magna Pure Compact    | MiSeq          | CLC Genomic Workbench 9.5.1 |
| CCUG 69183 = SK271 | <i>S. mitis</i>            | JPGW00000000.1  | PMID: 25053789        | PMID: 25053789 | PMID: 25053789              |
| CCUG 28588T        | <i>S. pneumoniae</i>       | LQXF00000000.1  | Promega               | HiSeq 2500     | CLC Genomic Workbench 8.0.1 |
| CCUG 7206          | <i>S. pneumoniae</i>       | LWCD00000000.1  | Magna Pure Compact    | MiSeq          | CLC Genomic Workbench 8.0.1 |
| CCUG 35180         | <i>S. pneumoniae</i>       | LQQK00000000.1  | Magna Pure Compact    | MiSeq          | CLC Genomic Workbench 8.0.1 |
