# Supplementary material for: Proteotyping bacteria: Characterization, differentiation and identification of pneumococcus and other species within the Mitis Group of the genus Streptococcus by tandem mass spectrometry proteomics
Source: PubMed Central journal article supplement (PMC6287849; doi:10.1371/journal.pone.0208804), 2018-12-10
Supplement: pone.0208804.s004.pdf [file pone.0208804.s004.pdf]

**S4 Table.****List of proteins identified by species-unique peptides in analysis of *S. pneumoniae* CCUG 28588T**

| Accession number | Description                                             | Nº peptides | Coverage |
|------------------|---------------------------------------------------------|-------------|----------|
| WP_001035310.1   | hypothetical protein                                    | 25          | 36,3     |
| WP_000685088.1   | UDP-glucose dehydrogenase                               | 11          | 44,1     |
| WP_001844726.1   | endo-beta-N-acetylglucosaminidase                       | 10          | 8,5      |
| WP_065251743.1   | choline-binding protein                                 | 10          | 23,5     |
| WP_000679960.1   | beta-N-acetylhexosaminidase                             | 8           | 7,9      |
| WP_001214397.1   | NAD-dependent dehydratase                               | 7           | 24,4     |
| WP_000727933.1   | foldase                                                 | 6           | 24,3     |
| WP_000434652.1   | thiol reductase thioredoxin                             | 4           | 44,3     |
| WP_000495824.1   | transcriptional regulator                               | 4           | 42,6     |
| WP_000811753.1   | alanine--tRNA ligase                                    | 4           | 4,0      |
| WP_000036661.1   | dihydroxyacetone kinase                                 | 3           | 8,6      |
| WP_000064115.1   | general stress protein                                  | 3           | 23,8     |
| WP_000767195.1   | hypothetical protein                                    | 3           | 13,1     |
| WP_000862350.1   | glycosyl transferase family 1                           | 3           | 10,4     |
| WP_001079795.1   | galacturonic acid acetylase                             | 3           | 21,9     |
| WP_001818788.1   | PTS glucose transporter subunit IIABC                   | 3           | 6,3      |
| WP_000116461.1   | trigger factor                                          | 2           | 8,4      |
| WP_000164758.1   | glycine--tRNA ligase subunit beta                       | 2           | 4,0      |
| WP_000201902.1   | RNA polymerase sigma factor SigA                        | 2           | 5,1      |
| WP_000245505.1   | 30S ribosomal protein S8                                | 2           | 14,4     |
| WP_000411198.1   | choline kinase                                          | 2           | 10,4     |
| WP_000432756.1   | alpha-mannosidase                                       | 2           | 5,4      |
| WP_000529016.1   | serine protease                                         | 2           | 4,3      |
| WP_000599104.1   | ribosome-associated factor Y                            | 2           | 6,0      |
| WP_000639574.1   | hypothetical protein                                    | 2           | 42,9     |
| WP_000664173.1   | capsular polysaccharide biosynthesis protein CpsC       | 2           | 16,1     |
| WP_000701442.1   | PTS fructose transporter subunit IIC                    | 2           | 5,4      |
| WP_000790743.1   | hypothetical protein                                    | 2           | 15,5     |
| WP_001032504.1   | YSIRK signal domain/LPXTG anchor domain surface protein | 2           | 2,0      |
| WP_001092741.1   | arginine--tRNA ligase                                   | 2           | 5,5      |
| WP_001162938.1   | dihydrolipoyl dehydrogenase                             | 2           | 5,3      |
| WP_001229596.1   | arginine ABC transporter ATP-binding protein            | 2           | 15,5     |
| WP_001232820.1   | alkaline amylopullulanase                               | 2           | 3,8      |
| WP_001818543.1   | cell division protein DivIVA                            | 2           | 11,1     |
| WP_000003933.1   | S-adenosylmethionine synthase                           | 1           | 4,0      |
| WP_000010163.1   | ribose-phosphate pyrophosphokinase 1                    | 1           | 3,4      |
| WP_000018260.1   | glucose-6-phosphate isomerase                           | 1           | 4,0      |
| WP_000022100.1   | purine-nucleoside phosphorylase                         | 1           | 5,9      |
| WP_000029860.1   | cysteine synthase A                                     | 1           | 7,8      |
| WP_000036769.1   | NADH oxidase                                            | 1           | 3,3      |
| WP_000039205.1   | translation initiation factor IF-2                      | 1           | 2,8      |
| WP_000039622.1   | FMN reductase                                           | 1           | 5,5      |
| WP_000053388.1   | cell division protein SepF                              | 1           | 15,6     |
| WP_000081003.1   | ferredoxin--NADP(+) reductase                           | 1           | 4,0      |
| WP_000086630.1   | 50S ribosomal protein L6                                | 1           | 8,4      |
| WP_000109138.1   | 50S ribosomal protein L21                               | 1           | 10,6     |

|                |                                                            |   |      |
|----------------|------------------------------------------------------------|---|------|
| WP_000109957.1 | CsbD family protein                                        | 1 | 26,9 |
| WP_000115730.1 | MULTISPECIES: hypothetical protein [Streptococcus]         | 1 | 13,7 |
| WP_000121713.1 | phosphoglucomutase                                         | 1 | 2,1  |
| WP_000136824.1 | membrane protein                                           | 1 | 4,2  |
| WP_000144280.1 | cell division protein FtsZ                                 | 1 | 2,9  |
| WP_000158725.1 | isochorismatase                                            | 1 | 9,4  |
| WP_000163684.1 | methionyl-tRNA formyltransferase                           | 1 | 5,1  |
| WP_000173353.1 | bacteriocin ABC transporter ATP-binding protein            | 1 | 6,0  |
| WP_000179632.1 | DNA topoisomerase I                                        | 1 | 2,3  |
| WP_000196418.1 | Fe-S cluster assembly protein SufD                         | 1 | 6,7  |
| WP_000221752.1 | hydroxymethylpyrimidine/phosphomethylpyrimidine kinase     | 1 | 3,8  |
| WP_000229878.1 | DNA starvation/stationary phase protection protein         | 1 | 12,2 |
| WP_000257841.1 | acyl carrier protein                                       | 1 | 18,9 |
| WP_000268677.1 | CBS domain-containing protein                              | 1 | 6,0  |
| WP_000283061.1 | pullulanase                                                | 1 | 2,4  |
| WP_000334275.1 | glutamine--fructose-6-phosphate aminotransferase           | 1 | 3,2  |
| WP_000348122.1 | aquaporin                                                  | 1 | 5,5  |
| WP_000380924.1 | GTP cyclohydrolase I FoIE                                  | 1 | 6,5  |
| WP_000386347.1 | MarR family transcriptional regulator                      | 1 | 10,4 |
| WP_000395924.1 | alpha-glycerophosphate oxidase                             | 1 | 1,5  |
| WP_000404940.1 | ribonuclease Y                                             | 1 | 2,4  |
| WP_000417162.1 | peptidase M26                                              | 1 | 0,6  |
| WP_000453139.1 | alanine aminotransferase                                   | 1 | 3,2  |
| WP_000472986.1 | zinc metalloprotease zmpB                                  | 1 | 1,0  |
| WP_000510591.1 | hypothetical protein                                       | 1 | 7,8  |
| WP_000517372.1 | hypothetical protein                                       | 1 | 14,0 |
| WP_000542470.1 | aspartate-semialdehyde dehydrogenase                       | 1 | 3,6  |
| WP_000546881.1 | tyrosine--tRNA ligase                                      | 1 | 6,7  |
| WP_000570244.1 | DUF4649 domain-containing protein                          | 1 | 16,4 |
| WP_000584891.1 | multidrug ABC transporter ATP-binding protein              | 1 | 2,8  |
| WP_000624331.1 | glutamine ABC transporter substrate-binding protein        | 1 | 7,1  |
| WP_000634929.1 | sialidase                                                  | 1 | 1,9  |
| WP_000649200.1 | zinc-dependent alcohol dehydrogenase                       | 1 | 4,7  |
| WP_000666471.1 | aminotransferase AlaT                                      | 1 | 2,7  |
| WP_000671133.1 | DEAD/DEAH box family ATP-dependent RNA helicase            | 1 | 2,9  |
| WP_000686956.1 | hypothetical protein                                       | 1 | 3,8  |
| WP_000705433.1 | aspartyl/glutamyl-tRNA(Asn/Gln) amidotransferase subunit C | 1 | 11,0 |
| WP_000724951.1 | amino acid ABC transporter substrate-binding protein       | 1 | 4,0  |
| WP_000729037.1 | hypothetical protein                                       | 1 | 10,7 |
| WP_000750087.1 | serine protease                                            | 1 | 0,7  |
| WP_000768069.1 | isoleucine--tRNA ligase                                    | 1 | 1,4  |
| WP_000777760.1 | MULTISPECIES: hypothetical protein [Streptococcus]         | 1 | 13,7 |
| WP_000797065.1 | Fe-S cluster assembly protein SufB                         | 1 | 2,3  |

|                |                                                        |   |      |
|----------------|--------------------------------------------------------|---|------|
| WP_000805597.1 | 5-(carboxyamino)imidazole ribonucleotide mutase        | 1 | 8,0  |
| WP_000814633.1 | D-alanine--D-alanine ligase                            | 1 | 3,7  |
| WP_000825669.1 | PEP phosphonomutase                                    | 1 | 4,0  |
| WP_000845290.1 | formate--tetrahydrofolate ligase                       | 1 | 2,3  |
| WP_000850024.1 | bifunctional protein PyrR                              | 1 | 9,2  |
| WP_000856522.1 | diaminopimelate decarboxylase                          | 1 | 3,6  |
| WP_000863038.1 | UDP-N-acetylmuramoylalanine--D-glutamate ligase        | 1 | 3,6  |
| WP_000887724.1 | cysteine desulfurase                                   | 1 | 3,7  |
| WP_000892184.1 | hypoxanthine phosphoribosyltransferase                 | 1 | 7,2  |
| WP_000907145.1 | MULTISPECIES: DNA-directed RNA polymerase subunit beta | 1 | 1,2  |
| WP_000940733.1 | GTP-sensing transcriptional pleiotropic repressor CodY | 1 | 5,7  |
| WP_000990607.1 | catabolite control protein A                           | 1 | 4,2  |
| WP_001034417.1 | arginine repressor                                     | 1 | 9,1  |
| WP_001042590.1 | DNA ligase (NAD(+)) LigA                               | 1 | 2,1  |
| WP_001047204.1 | elongation factor 4                                    | 1 | 2,1  |
| WP_001063454.1 | ATP-dependent Clp protease ATP-binding subunit         | 1 | 1,6  |
| WP_001064551.1 | PTS beta-glucoside transporter subunit EIIBC A         | 1 | 2,4  |
| WP_001140347.1 | hypothetical protein                                   | 1 | 4,5  |
| WP_001140486.1 | prephenate dehydrogenase                               | 1 | 3,8  |
| WP_001142516.1 | tyrosine protein kinase                                | 1 | 5,9  |
| WP_001145974.1 | cytosine-specific methyltransferase NlaX               | 1 | 3,0  |
| WP_001162129.1 | flavodoxin                                             | 1 | 7,5  |
| WP_001262221.1 | ribosome recycling factor                              | 1 | 5,9  |
| WP_001291372.1 | methionine--tRNA ligase                                | 1 | 2,7  |
| WP_001291649.1 | aminodeoxychorismate lyase                             | 1 | 1,8  |
| WP_001844622.1 | carbamoyl phosphate synthase large subunit             | 1 | 1,4  |
| WP_001844943.1 | DNA-directed RNA polymerase subunit omega              | 1 | 18,3 |
