# Supplementary material for: Proteotyping bacteria: Characterization, differentiation and identification of pneumococcus and other species within the Mitis Group of the genus Streptococcus by tandem mass spectrometry proteomics
Source: PubMed Central journal article supplement (PMC6287849; doi:10.1371/journal.pone.0208804), 2018-12-10
Supplement: pone.0208804.s005.pdf [file pone.0208804.s005.pdf]

**S5 Table.****List of proteins identified by species-unique peptides in analysis of *S. pneumoniae* CCUG 7206**

| Accession number | Description                                     | Nº peptides | Coverage |
|------------------|-------------------------------------------------|-------------|----------|
| WP_063642986.1   | sialidase                                       | 11          | 13,0     |
| WP_000417171.1   | immunoglobulin A1 protease                      | 8           | 9,3      |
| WP_000727935.1   | foldase                                         | 6           | 15,7     |
| WP_000064115.1   | general stress protein                          | 4           | 15,3     |
| WP_000094618.1   | arginine deiminase                              | 4           | 11,7     |
| WP_001162912.1   | dihydrolipoamide dehydrogenase                  | 4           | 12,0     |
| WP_001855682.1   | endo-beta-N-acetylglucosaminidase               | 4           | 2,6      |
| WP_000186955.1   | membrane protein                                | 3           | 8,6      |
| WP_000448317.1   | N-acetylmannosamine-6-phosphate 2-epimerase     | 3           | 19,7     |
| WP_000686980.1   | hypothetical protein                            | 3           | 9,7      |
| WP_050273778.1   | zinc metalloprotease                            | 3           | 2,7      |
| WP_063643216.1   | hypothetical protein                            | 3           | 5,4      |
| WP_000105362.1   | pyruvate dehydrogenase E1 subunit alpha         | 2           | 8,1      |
| WP_000120709.1   | lactate oxidase                                 | 2           | 4,0      |
| WP_000167757.1   | acetate kinase                                  | 2           | 8,6      |
| WP_000185363.1   | ornithine carbamoyltransferase                  | 2           | 10,4     |
| WP_000434650.1   | thiol reductase thioredoxin                     | 2           | 18,3     |
| WP_000546887.1   | tyrosine--tRNA ligase                           | 2           | 9,8      |
| WP_000671113.1   | DEAD/DEAH box family ATP-dependent RNA helicase | 2           | 5,5      |
| WP_000790743.1   | hypothetical protein                            | 2           | 7,9      |
| WP_001029637.1   | PTS cellbiose transporter subunit IIC           | 2           | 15,4     |
| WP_001085463.1   | DNA recombination/repair protein RecA           | 2           | 4,9      |
| WP_001092701.1   | arginine--tRNA ligase                           | 2           | 3,7      |
| WP_001232811.1   | alkaline amylopullulanase                       | 2           | 2,7      |
| WP_050146947.1   | glycine--tRNA ligase subunit beta               | 2           | 4,0      |
| WP_061694626.1   | beta-N-acetylhexosaminidase                     | 2           | 1,6      |
| WP_063643199.1   | trigger factor                                  | 2           | 7,5      |
| WP_000003935.1   | S-adenosylmethionine synthase                   | 1           | 4,0      |
| WP_000031585.1   | molecular chaperone GroEL                       | 1           | 3,3      |
| WP_000033099.1   | phosphopentomutase                              | 1           | 3,5      |
| WP_000039210.1   | translation initiation factor IF-2              | 1           | 1,9      |
| WP_000086630.1   | 50S ribosomal protein L6                        | 1           | 8,4      |
| WP_000095485.1   | sugar ABC transporter substrate-binding protein | 1           | 4,0      |
| WP_000105270.1   | GntR family transcriptional regulator           | 1           | 5,0      |
| WP_000109957.1   | CsbD family protein                             | 1           | 16,4     |
| WP_000121704.1   | phosphoglucomutase                              | 1           | 2,4      |
| WP_000136830.1   | membrane protein                                | 1           | 3,9      |
| WP_000141506.1   | dTDP-glucose 4,6-dehydratase                    | 1           | 4,3      |
| WP_000144280.1   | cell division protein FtsZ                      | 1           | 2,9      |
| WP_000201898.1   | RNA polymerase sigma factor SigA                | 1           | 3,5      |
| WP_000245505.1   | 30S ribosomal protein S8                        | 1           | 10,6     |
| WP_000257841.1   | acyl carrier protein                            | 1           | 18,9     |
| WP_000260018.1   | DNA-binding protein                             | 1           | 6,4      |
| WP_000268662.1   | CBS domain-containing protein                   | 1           | 6,0      |
| WP_000348122.1   | aquaporin                                       | 1           | 5,5      |
| WP_000370269.1   | glycogen-branching enzyme                       | 1           | 2,2      |
| WP_000404940.1   | ribonuclease Y                                  | 1           | 2,4      |

|                |                                                     |   |      |
|----------------|-----------------------------------------------------|---|------|
| WP_000510591.1 | hypothetical protein                                | 1 | 7,8  |
| WP_000575212.1 | glycine/betaine ABC transporter ATP-binding protein | 1 | 7,0  |
| WP_000600913.1 | NAD(P)-dependent oxidoreductase                     | 1 | 3,9  |
| WP_000705418.1 | glutamyl-tRNA amidotransferase subunit C            | 1 | 14,0 |
| WP_000706826.1 | N-acetylgalactosamine transporter subunit IIA       | 1 | 9,0  |
| WP_000729030.1 | hypothetical protein                                | 1 | 10,7 |
| WP_000742290.1 | hypothetical protein                                | 1 | 5,0  |
| WP_000744557.1 | ATP-dependent zinc metalloprotease FtsH             | 1 | 2,1  |
| WP_000767193.1 | hypothetical protein                                | 1 | 12,1 |
| WP_000850024.1 | bifunctional protein PyrR                           | 1 | 9,2  |
| WP_000863023.1 | UDP-N-acetylmuramoylalanine--D-glutamate ligase     | 1 | 3,6  |
| WP_000887717.1 | cysteine desulfurase                                | 1 | 3,7  |
| WP_000892185.1 | hypoxanthine-guanine phosphoribosyltransferase      | 1 | 7,2  |
| WP_000907135.1 | DNA-directed RNA polymerase subunit beta            | 1 | 1,2  |
| WP_000963678.1 | DNA mismatch repair protein MutS                    | 1 | 1,3  |
| WP_000990607.1 | catabolite control protein A                        | 1 | 4,2  |
| WP_000992853.1 | ATP-dependent DNA helicase PcrA                     | 1 | 2,2  |
| WP_001032456.1 | endo-alpha-N-acetylgalactosaminidase                | 1 | 0,6  |
| WP_001034415.1 | arginine repressor                                  | 1 | 9,1  |
| WP_001047204.1 | elongation factor 4                                 | 1 | 2,1  |
| WP_001085888.1 | aminoacyl-tRNA deacylase                            | 1 | 6,9  |
| WP_001096142.1 | hypothetical protein                                | 1 | 6,5  |
| WP_001162129.1 | flavodoxin                                          | 1 | 7,5  |
| WP_001291409.1 | methionine--tRNA ligase                             | 1 | 2,7  |
| WP_001291650.1 | aminodeoxychorismate lyase                          | 1 | 1,8  |
| WP_001809950.1 | 50S ribosomal protein L33                           | 1 | 18,0 |
| WP_001818381.1 | PTS glucose transporter subunit IIABC               | 1 | 2,5  |
| WP_001818543.1 | cell division protein DivIVA                        | 1 | 5,0  |
| WP_033705237.1 | pullulanase                                         | 1 | 2,4  |
| WP_050084726.1 | NADPH-dependent FMN reductase                       | 1 | 5,5  |
| WP_050213965.1 | Clp protease ClpX                                   | 1 | 1,4  |
| WP_050256225.1 | phosphorylcholine transferase LicD                  | 1 | 6,3  |
| WP_057485901.1 | valine--tRNA ligase                                 | 1 | 1,4  |
| WP_061372758.1 | glutamate--tRNA ligase                              | 1 | 3,3  |
| WP_063642991.1 | PTS beta-glucoside transporter subunit EIIBCA       | 1 | 2,4  |
| WP_063643115.1 | choline kinase                                      | 1 | 3,8  |
| WP_063643118.1 | endonuclease                                        | 1 | 2,0  |
| WP_063643127.1 | chromosome segregation protein SMC                  | 1 | 1,2  |
| WP_063643275.1 | alanine aminotransferase                            | 1 | 3,2  |
| WP_063643338.1 | glycerol kinase                                     | 1 | 3,6  |
| WP_063643343.1 | N-acetyl-beta-D-glucosaminidase                     | 1 | 3,2  |
