# Supplementary material for: Proteotyping bacteria: Characterization, differentiation and identification of pneumococcus and other species within the Mitis Group of the genus Streptococcus by tandem mass spectrometry proteomics
Source: PubMed Central journal article supplement (PMC6287849; doi:10.1371/journal.pone.0208804), 2018-12-10
Supplement: pone.0208804.s006.pdf [file pone.0208804.s006.pdf]

**S6 Table.****List of proteins identified by species-unique peptides in analysis of *S. pneumoniae* CCUG 35180**

| Accession number | Description                                   | Nº peptides | Coverage |
|------------------|-----------------------------------------------|-------------|----------|
| WP_054381254.1   | choline-binding protein                       | 25          | 33,5     |
| WP_000634963.1   | sialidase                                     | 19          | 27,0     |
| WP_000064115.1   | general stress protein                        | 5           | 23,8     |
| WP_000863391.1   | sugar-binding protein                         | 5           | 22,6     |
| WP_000094617.1   | arginine deiminase                            | 4           | 11,7     |
| WP_000686975.1   | hypothetical protein                          | 4           | 14,2     |
| WP_000727935.1   | foldase                                       | 4           | 15,3     |
| WP_001032494.1   | endo-alpha-N-acetylgalactosaminidase          | 4           | 3,3      |
| WP_001162695.1   | dihydrolipoyl dehydrogenase                   | 4           | 12,0     |
| WP_001232790.1   | alkaline amylopullulanase                     | 4           | 3,3      |
| WP_001291665.1   | aminodeoxychorismate lyase                    | 4           | 8,5      |
| WP_000053388.1   | cell division protein SepF                    | 3           | 16,2     |
| WP_000121704.1   | phosphoglucomutase                            | 3           | 7,9      |
| WP_000434644.1   | thiol reductase thioredoxin                   | 3           | 28,7     |
| WP_000599104.1   | ribosome-associated factor Y                  | 3           | 8,8      |
| WP_000767195.1   | hypothetical protein                          | 3           | 13,1     |
| WP_000790743.1   | hypothetical protein                          | 3           | 12,6     |
| WP_000837080.1   | cell wall-binding protein                     | 3           | 7,1      |
| WP_000880678.1   | tail protein                                  | 3           | 17,5     |
| WP_001820922.1   | endo-beta-N-acetylglucosaminidase             | 3           | 2,3      |
| WP_000011015.1   | DEAD/DEAH box helicase                        | 2           | 5,8      |
| WP_000018263.1   | glucose-6-phosphate isomerase                 | 2           | 6,9      |
| WP_000036674.1   | dihydroxyacetone kinase                       | 2           | 6,3      |
| WP_000086630.1   | 50S ribosomal protein L6                      | 2           | 8,4      |
| WP_000116465.1   | trigger factor                                | 2           | 7,5      |
| WP_000164772.1   | glycine--tRNA ligase subunit beta             | 2           | 4,0      |
| WP_000185363.1   | ornithine carbamoyltransferase                | 2           | 10,4     |
| WP_000395959.1   | alpha-glycerophosphate oxidase                | 2           | 4,8      |
| WP_000515192.1   | beta-galactosidase                            | 2           | 1,9      |
| WP_000679942.1   | beta-N-acetylhexosaminidase                   | 2           | 2,1      |
| WP_000723325.1   | UDP-N-acetyl glucosamine 2-epimerase          | 2           | 8,8      |
| WP_001196960.1   | 50S ribosomal protein L7/L12                  | 2           | 15,6     |
| WP_041172731.1   | peptidase M26, partial                        | 2           | 1,9      |
| WP_050200722.1   | peptidoglycan GlcNAc deacetylase              | 2           | 6,0      |
| WP_000003936.1   | S-adenosylmethionine synthase                 | 1           | 4,0      |
| WP_000010157.1   | ribose-phosphate pyrophosphokinase            | 1           | 3,4      |
| WP_000011758.1   | leucine--tRNA ligase                          | 1           | 1,9      |
| WP_000013420.1   | carbamate kinase                              | 1           | 4,8      |
|                  | MULTISPECIES: PTS mannose transporter subunit |             |          |
| WP_000021975.1   | EIIAB                                         | 1           | 4,0      |
| WP_000022102.1   | purine-nucleoside phosphorylase               | 1           | 5,9      |
| WP_000031090.1   | glutamate--tRNA ligase                        | 1           | 3,3      |
| WP_000032242.1   | valine--tRNA ligase                           | 1           | 1,4      |
| WP_000041492.1   | addiction module antitoxin RelB               | 1           | 13,8     |
| WP_000081011.1   | ferredoxin--NADP(+) reductase                 | 1           | 4,0      |
| WP_000083614.1   | hypothetical protein                          | 1           | 5,9      |
| WP_000090344.1   | elongation factor G                           | 1           | 1,7      |

|                |                                                                                                 |   |      |
|----------------|-------------------------------------------------------------------------------------------------|---|------|
| WP_000120709.1 | lactate oxidase                                                                                 | 1 | 4,0  |
| WP_000136830.1 | membrane protein                                                                                | 1 | 3,9  |
| WP_000144280.1 | cell division protein FtsZ                                                                      | 1 | 2,9  |
| WP_000167622.1 | malonyl CoA-acyl carrier protein transacylase                                                   | 1 | 4,6  |
| WP_000167766.1 | acetate kinase                                                                                  | 1 | 4,5  |
| WP_000201898.1 | RNA polymerase sigma factor SigA                                                                | 1 | 3,5  |
| WP_000202235.1 | UTP--glucose-1-phosphate uridylyltransferase<br>hydroxymethylpyrimidine/phosphomethylpyrimidine | 1 | 4,0  |
| WP_000221749.1 | kinase                                                                                          | 1 | 3,8  |
| WP_000245505.1 | 30S ribosomal protein S8                                                                        | 1 | 10,6 |
| WP_000257841.1 | acyl carrier protein                                                                            | 1 | 18,9 |
| WP_000260025.1 | DNA-binding protein                                                                             | 1 | 6,4  |
| WP_000268677.1 | CBS domain-containing protein                                                                   | 1 | 6,0  |
| WP_000280960.1 | chromosome segregation protein SMC                                                              | 1 | 1,2  |
| WP_000283118.1 | nicotinate phosphoribosyltransferase                                                            | 1 | 2,5  |
| WP_000334265.1 | glutamine--fructose-6-phosphate aminotransferase                                                | 1 | 3,0  |
| WP_000348126.1 | aquaporin                                                                                       | 1 | 5,5  |
| WP_000354338.1 | ribonuclease Z                                                                                  | 1 | 4,5  |
| WP_000359340.1 | PTS lactose transporter subunit IIBC                                                            | 1 | 2,0  |
| WP_000386347.1 | MarR family transcriptional regulator                                                           | 1 | 10,4 |
| WP_000404940.1 | ribonuclease Y                                                                                  | 1 | 2,4  |
| WP_000453143.1 | alanine aminotransferase                                                                        | 1 | 3,2  |
| WP_000473015.1 | zinc metalloprotease                                                                            | 1 | 0,5  |
| WP_000477450.1 | PTS glucose transporter subunit IIBC                                                            | 1 | 3,4  |
| WP_000517372.1 | hypothetical protein                                                                            | 1 | 14,0 |
| WP_000522316.1 | signal recognition particle-docking protein FtsY                                                | 1 | 6,8  |
| WP_000569207.1 | 3-dehydroquinate dehydratase                                                                    | 1 | 4,4  |
| WP_000570244.1 | DUF4649 domain-containing protein                                                               | 1 | 16,4 |
| WP_000590986.1 | amino acid ABC transporter ATP-binding protein                                                  | 1 | 6,1  |
| WP_000676130.1 | glucose-1-phosphate thymidylyltransferase                                                       | 1 | 5,2  |
| WP_000728634.1 | transporter                                                                                     | 1 | 4,3  |
| WP_000744551.1 | cell division protein FtsH                                                                      | 1 | 2,1  |
| WP_000797073.1 | Fe-S cluster assembly protein SufB                                                              | 1 | 2,3  |
| WP_000808456.1 | membrane protein                                                                                | 1 | 4,0  |
| WP_000809624.1 | PTS sugar transporter subunit IIB                                                               | 1 | 13,7 |
| WP_000811723.1 | alanine--tRNA ligase                                                                            | 1 | 1,0  |
| WP_000830868.1 | aspartate--tRNA ligase                                                                          | 1 | 1,9  |
| WP_000850024.1 | bifunctional protein PyrR                                                                       | 1 | 9,2  |
| WP_000852249.1 | hypothetical protein                                                                            | 1 | 12,9 |
| WP_000863026.1 | UDP-N-acetylmuramoylalanine--D-glutamate ligase                                                 | 1 | 3,6  |
| WP_000882537.1 | ATP-dependent Clp protease ATP-binding subunit                                                  | 1 | 1,6  |
| WP_000884255.1 | serine--tRNA ligase                                                                             | 1 | 3,5  |
| WP_000887726.1 | cysteine desulfurase                                                                            | 1 | 3,7  |
| WP_000892185.1 | hypoxanthine-guanine phosphoribosyltransferase                                                  | 1 | 7,2  |
| WP_000903552.1 | tagatose-6-phosphate ketose                                                                     | 1 | 3,9  |
| WP_000907135.1 | DNA-directed RNA polymerase subunit beta                                                        | 1 | 1,2  |
| WP_000940733.1 | GTP-sensing transcriptional pleiotropic repressor<br>CodY                                       | 1 | 5,7  |

|                |                                              |   |     |
|----------------|----------------------------------------------|---|-----|
| WP_000958925.1 | pyridine nucleotide-disulfide oxidoreductase | 1 | 3,0 |
| WP_000963680.1 | DNA mismatch repair protein MutS             | 1 | 1,3 |
| WP_000990607.1 | catabolite control protein A                 | 1 | 4,2 |
| WP_000991679.1 | aminopeptidase C                             | 1 | 3,4 |
| WP_000992885.1 | ATP-dependent DNA helicase PcrA              | 1 | 2,2 |
| WP_001034412.1 | arginine repressor                           | 1 | 9,1 |
| WP_001042568.1 | DNA ligase (NAD(+)) LigA                     | 1 | 2,1 |
| WP_001047220.1 | elongation factor 4                          | 1 | 2,0 |
| WP_001061594.1 | hypothetical protein                         | 1 | 9,8 |
| WP_001077246.1 | peptidase M42                                | 1 | 3,2 |
| WP_001085463.1 | DNA recombination/repair protein RecA        | 1 | 4,4 |
| WP_001099660.1 | 2,5-diketo-D-gluconic acid reductase         | 1 | 4,3 |
| WP_001156827.1 | glucan 1,6-alpha-glucosidase                 | 1 | 3,6 |
| WP_001157038.1 | hypothetical protein                         | 1 | 3,8 |
| WP_001199649.1 | phosphorylcholine transferase LicD           | 1 | 6,3 |
| WP_001200062.1 | tRNA sulfurtransferase Thil                  | 1 | 3,0 |
| WP_001212028.1 | Xaa-Pro dipeptidyl-peptidase                 | 1 | 1,6 |
| WP_001281489.1 | N-acetylneuraminatase lyase                  | 1 | 5,6 |
| WP_001284361.1 | pneumolysin                                  | 1 | 2,8 |
| WP_001291369.1 | methionine--tRNA ligase                      | 1 | 2,7 |
| WP_001810114.1 | cell division protein DivIVA                 | 1 | 5,0 |
| WP_001818381.1 | PTS glucose transporter subunit IIABC        | 1 | 2,5 |
| WP_054409198.1 | translation initiation factor IF-2           | 1 | 1,9 |
| WP_054409214.1 | aminotransferase V                           | 1 | 3,7 |
| WP_054409227.1 | flavodoxin                                   | 1 | 7,5 |
| WP_063612813.1 | tyrosine protein kinase                      | 1 | 5,7 |
| WP_063612814.1 | capsular biosynthesis protein CpsC           | 1 | 4,8 |
| WP_063612827.1 | hypothetical protein, partial                | 1 | 3,8 |
