# Supplementary material for: Proteotyping bacteria: Characterization, differentiation and identification of pneumococcus and other species within the Mitis Group of the genus Streptococcus by tandem mass spectrometry proteomics
Source: PubMed Central journal article supplement (PMC6287849; doi:10.1371/journal.pone.0208804), 2018-12-10
Supplement: pone.0208804.s007.pdf [file pone.0208804.s007.pdf]

**S7 Table.****List of proteins identified by species-unique peptides in analysis of *S. mitis* CCUG 31611T**

| Accession number | Description                                             | Nº peptides | Coverage |
|------------------|---------------------------------------------------------|-------------|----------|
| OOS15439.1       | choline-binding protein A                               | 22          | 41,2     |
| OOS15436.1       | maebl                                                   | 10          | 11,2     |
| OOS16375.1       | YSIRK signal domain/LPXTG anchor domain surface protein | 8           | 4,1      |
| OOS17165.1       | pullulanase                                             | 8           | 9,2      |
| OOS15437.1       | PspC family transcriptional regulator                   | 6           | 18,8     |
| OOS15639.1       | septation ring formation regulator EzrA                 | 6           | 13,2     |
| OOS16702.1       | cell division protein FtsZ                              | 6           | 22,0     |
| OOS15438.1       | nucleoside triphosphate hydrolase                       | 5           | 14,3     |
| OOS15642.1       | ribose-5-phosphate isomerase                            | 5           | 30,3     |
| OOS15740.1       | foldase PrsA                                            | 5           | 17,9     |
| OOS16219.1       | peptide ABC transporter ATP-binding protein             | 5           | 10,7     |
| OOS16700.1       | cell division protein SepF                              | 5           | 37,3     |
| OOS16703.1       | cell division protein FtsA                              | 5           | 14,6     |
| OOS17049.1       | hypothetical protein B0679_00520                        | 5           | 21,8     |
| OOS15407.1       | GntR family transcriptional regulator                   | 4           | 13,4     |
| OOS16697.1       | cell division protein DivIVA                            | 4           | 25,8     |
| OOS16994.1       | ribosomal subunit interface protein                     | 4           | 12,6     |
| OOS17342.1       | DNA-directed RNA polymerase subunit omega               | 4           | 18,3     |
| OOS14650.1       | protein jag                                             | 3           | 11,6     |
| OOS15287.1       | zinc metalloprotease                                    | 3           | 2,6      |
| OOS15399.1       | choline-binding protein C                               | 3           | 6,3      |
| OOS15897.1       | thiol reductase thioredoxin                             | 3           | 27,0     |
| OOS16247.1       | peptide ABC transporter ATP-binding protein             | 3           | 7,3      |
| OOS16777.1       | general stress protein                                  | 3           | 27,7     |
| OOS17016.1       | alpha-glycerophosphate oxidase                          | 3           | 3,5      |
| OOS17172.1       | recombinase RecA                                        | 3           | 8,6      |
| OOS14652.1       | transketolase                                           | 2           | 4,1      |
| OOS14902.1       | CBS domain-containing protein                           | 2           | 11,5     |
| OOS14906.1       | PTS glucose/maltose transporter subunit IIBCA           | 2           | 4,5      |
| OOS15272.1       | aminodeoxychorismate lyase                              | 2           | 5,3      |
| OOS15388.1       | potassium transporter Trk                               | 2           | 13,1     |
| OOS15405.1       | PTS mannose transporter subunit IIAB                    | 2           | 8,9      |
| OOS15620.1       | efflux transporter periplasmic adaptor subunit          | 2           | 16,0     |
| OOS15742.1       | phosphoenolpyruvate carboxylase                         | 2           | 3,0      |
| OOS15963.1       | phosphorylcholine transferase LicD                      | 2           | 9,7      |
| OOS16003.1       | lysine--tRNA ligase                                     | 2           | 4,6      |
| OOS16057.1       | NAD(P)H-dependent oxidoreductase                        | 2           | 10,4     |
| OOS16060.1       | glycine--tRNA ligase subunit beta                       | 2           | 6,6      |
| OOS16204.1       | PTS mannose transporter subunit EIIB                    | 2           | 11,2     |
| OOS16401.1       | hypothetical protein B0679_04510                        | 2           | 5,0      |
| OOS16718.1       | sugar ABC transporter substrate-binding protein         | 2           | 9,3      |
| OOS16964.1       | serine protease                                         | 2           | 7,4      |
| OOS16986.1       | CHAP domain-containing protein                          | 2           | 5,1      |
| OOS17207.1       | phenylalanine--tRNA ligase subunit beta                 | 2           | 3,7      |
| OOS17209.1       | sodium ABC transporter permease                         | 2           | 9,5      |
| OOS17305.1       | enoyl-CoA hydratase                                     | 2           | 9,2      |
| OOS17306.1       | MarR family transcriptional regulator                   | 2           | 16,7     |

|            |                                                    |   |      |
|------------|----------------------------------------------------|---|------|
| OOS17307.1 | ketoacyl-ACP synthase III                          | 2 | 14,2 |
| OOS17311.1 | beta-ketoacyl-ACP reductase                        | 2 | 6,6  |
| OOS17346.1 | protein phosphatase                                | 2 | 11,4 |
| OOS17369.1 | polyribonucleotide nucleotidyltransferase          | 2 | 2,4  |
| OOS14630.1 | peptidoglycan-binding protein LysM                 | 1 | 5,2  |
| OOS14647.1 | acetate kinase                                     | 1 | 4,0  |
| OOS14905.1 | cell division protein FtsX                         | 1 | 7,8  |
| OOS14908.1 | DEAD/DEAH box helicase                             | 1 | 2,0  |
| OOS15245.1 | aspartate aminotransferase                         | 1 | 3,6  |
| OOS15269.1 | UDP-N-acetylmuramate--L-alanine ligase             | 1 | 2,7  |
| OOS15288.1 | matrix-binding protein, partial                    | 1 | 1,9  |
| OOS15393.1 | muramidase                                         | 1 | 0,8  |
| OOS15428.1 | choline-binding protein C                          | 1 | 3,0  |
| OOS15615.1 | hypothetical protein B0679_05130                   | 1 | 11,6 |
| OOS15622.1 | hypothetical protein B0679_05165                   | 1 | 2,6  |
| OOS15636.1 | DJ-1 family protein                                | 1 | 7,6  |
| OOS15652.1 | ribose-5-phosphate isomerase                       | 1 | 9,3  |
| OOS15674.1 | peptide ABC transporter ATP-binding protein        | 1 | 2,3  |
| OOS15681.1 | cysteine desulfurase                               | 1 | 3,2  |
| OOS15684.1 | D-alanyl-D-alanine carboxypeptidase                | 1 | 3,9  |
| OOS15699.1 | gamma-glutamyl-phosphate reductase                 | 1 | 2,9  |
| OOS15700.1 | pyrroline-5-carboxylate reductase                  | 1 | 3,8  |
| OOS15754.1 | ATP-dependent 6-phosphofructokinase                | 1 | 5,4  |
| OOS15770.1 | arginine repressor                                 | 1 | 9,1  |
| OOS15780.1 | tagatose-6-phosphate kinase                        | 1 | 4,5  |
| OOS15806.1 | pyruvate dehydrogenase                             | 1 | 6,5  |
| OOS15809.1 | dihydrolipoyl dehydrogenase                        | 1 | 1,9  |
| OOS15848.1 | hypothetical protein B0679_06385                   | 1 | 5,2  |
| OOS15851.1 | serine hydroxymethyltransferase                    | 1 | 3,1  |
| OOS15911.1 | cysteine desulfurase                               | 1 | 4,6  |
| OOS15936.1 | glucose-6-phosphate dehydrogenase                  | 1 | 3,2  |
| OOS15937.1 | signal recognition particle-docking protein FtsY   | 1 | 3,3  |
| OOS15990.1 | DHH family phosphoesterase                         | 1 | 4,8  |
| OOS15992.1 | nucleoid-associated protein, YbaB/Ebfc family      | 1 | 15,2 |
| OOS16041.1 | metallophosphatase                                 | 1 | 5,4  |
| OOS16055.1 | NADH oxidase                                       | 1 | 2,4  |
| OOS16058.1 | NAD(P)H-dependent oxidoreductase                   | 1 | 2,9  |
| OOS16062.1 | aldehyde-activating protein                        | 1 | 13,0 |
| OOS16063.1 | 2,5-diketo-D-gluconic acid reductase               | 1 | 5,7  |
| OOS16197.1 | aminopeptidase                                     | 1 | 4,3  |
| OOS16213.1 | catabolite control protein A                       | 1 | 4,2  |
| OOS16248.1 | peptide ABC transporter permease                   | 1 | 3,4  |
| OOS16298.1 | translation initiation factor IF-2                 | 1 | 2,0  |
| OOS16300.1 | DNA-binding protein                                | 1 | 10,3 |
| OOS16320.1 | hypothetical protein B0679_04085                   | 1 | 13,7 |
| OOS16380.1 | 1,4-beta-N-acetylmuramidase                        | 1 | 2,4  |
| OOS16390.1 | ferredoxin--NADP(+) reductase                      | 1 | 5,3  |
| OOS16564.1 | chlorohydrolase                                    | 1 | 3,8  |
| OOS16584.1 | 3-dehydroquinase                                   | 1 | 5,3  |
| OOS16604.1 | phosphate transport system regulatory protein PhoU | 1 | 4,6  |

|            |                                                           |   |      |
|------------|-----------------------------------------------------------|---|------|
| OOS16617.1 | diacylglyceryl transferase                                | 1 | 14,0 |
| OOS16620.1 | HPr kinase/phosphorylase                                  | 1 | 5,4  |
| OOS16629.1 | beta-galactosidase                                        | 1 | 0,7  |
| OOS16646.1 | peptidase M24 family protein                              | 1 | 3,9  |
| OOS16667.1 | antibiotic ABC transporter permease                       | 1 | 3,9  |
| OOS16687.1 | endopeptidase                                             | 1 | 2,5  |
| OOS16706.1 | D-alanine--D-alanine ligase A                             | 1 | 3,7  |
| OOS16719.1 | PTS glucose transporter subunit IIBC                      | 1 | 3,4  |
| OOS16721.1 | acetylxyln esterase                                       | 1 | 3,4  |
| OOS16727.1 | 3-deoxy-7-phosphoheptulonate synthase                     | 1 | 3,2  |
| OOS16728.1 | preprotein translocase subunit SecA                       | 1 | 2,4  |
| OOS16752.1 | acetoin reductase                                         | 1 | 5,1  |
| OOS16793.1 | DUF421 domain-containing protein                          | 1 | 5,7  |
| OOS16952.1 | hypoxanthine phosphoribosyltransferase                    | 1 | 9,4  |
| OOS16973.1 | tryptophan--tRNA ligase                                   | 1 | 7,3  |
| OOS16988.1 | translation elongation factor Ts                          | 1 | 4,6  |
| OOS16996.1 | 50S ribosomal protein L9                                  | 1 | 10,0 |
| OOS17026.1 | dTDP-glucose 4,6-dehydratase                              | 1 | 3,9  |
| OOS17047.1 | hypothetical protein B0679_00510                          | 1 | 4,9  |
| OOS17083.1 | ABC transporter permease                                  | 1 | 11,9 |
| OOS17151.1 | leucine--tRNA ligase                                      | 1 | 1,4  |
| OOS17161.1 | proline--tRNA ligase                                      | 1 | 2,9  |
| OOS17171.1 | competence/damage-inducible protein A                     | 1 | 3,8  |
| OOS17183.1 | hypothetical protein B0679_01225                          | 1 | 3,1  |
| OOS17208.1 | sodium ABC transporter ATP-binding protein                | 1 | 5,4  |
| OOS17255.1 | alpha-glucosidase                                         | 1 | 2,8  |
| OOS17260.1 | tyrosine protein kinase                                   | 1 | 5,6  |
| OOS17270.1 | capsular biosynthesis protein                             | 1 | 3,6  |
| OOS17271.1 | galactofuranosyltransferase                               | 1 | 4,5  |
| OOS17281.1 | Holliday junction resolvase                               | 1 | 5,5  |
| OOS17309.1 | 2-nitropropane dioxygenase                                | 1 | 3,4  |
| OOS17310.1 | malonyl CoA-acyl carrier protein transacylase             | 1 | 5,2  |
| OOS17315.1 | acetyl-CoA carboxylase biotin carboxylase subunit         | 1 | 3,1  |
| OOS17316.1 | acetyl-CoA carboxylase subunit beta                       | 1 | 3,8  |
| OOS17317.1 | acetyl-CoA carboxylase carboxyl transferase subunit alpha | 1 | 10,6 |
| OOS17324.1 | aspartyl/glutamyl-tRNA amidotransferase subunit A         | 1 | 3,1  |
| OOS17337.1 | ribosome silencing factor RsfS                            | 1 | 8,5  |
| OOS17341.1 | guanylate kinase                                          | 1 | 8,2  |
| OOS17383.1 | phenylalanine--tRNA ligase subunit alpha                  | 1 | 3,4  |
