# Supplementary material for: Proteotyping bacteria: Characterization, differentiation and identification of pneumococcus and other species within the Mitis Group of the genus Streptococcus by tandem mass spectrometry proteomics
Source: PubMed Central journal article supplement (PMC6287849; doi:10.1371/journal.pone.0208804), 2018-12-10
Supplement: pone.0208804.s008.pdf [file pone.0208804.s008.pdf]

**S8 Table.****List of proteins identified by species-unique peptides in analysis of *S. mitis* CCUG 63687**

| Accession number | Description                                                      | Nº peptides | Coverage |
|------------------|------------------------------------------------------------------|-------------|----------|
| OOS16424.1       | choline-binding protein A                                        | 15          | 47,7     |
| OOS19177.1       | hypothetical protein B0686_04340                                 | 14          | 24,8     |
| OOS16425.1       | nucleoside triphosphate hydrolase                                | 10          | 25,7     |
| OOS17710.1       | YSIRK signal domain/LPXTG anchor domain surface protein, partial | 9           | 7,0      |
| OOS18831.1       | hypothetical protein B0686_02450                                 | 9           | 30,9     |
| OOS16475.1       | muramidase                                                       | 8           | 5,8      |
| OOS18546.1       | hypothetical protein B0686_00900                                 | 8           | 12,6     |
| OOS18691.1       | glucose-1-phosphate adenyltransferase subunit GlgD               | 8           | 18,7     |
| OOS17472.1       | phosphatidylethanolamine-binding protein                         | 7           | 26,9     |
| OOS17915.1       | pullulanase                                                      | 7           | 9,6      |
| OOS19245.1       | cell division protein FtsZ                                       | 7           | 18,7     |
| OOS17800.1       | choline-binding protein C                                        | 6           | 16,9     |
| OOS18097.1       | ribosome-associated protein                                      | 6           | 12,6     |
| OOS18799.1       | phosphatidylethanolamine-binding protein                         | 6           | 52,4     |
| OOS17619.1       | YSIRK signal domain/LPXTG anchor domain surface protein          | 5           | 3,3      |
| OOS18557.1       | peptide ABC transporter ATP-binding protein                      | 5           | 9,5      |
| OOS19029.1       | septation ring formation regulator EzrA                          | 5           | 12,5     |
| OOS18412.1       | aminodeoxychorismate lyase                                       | 4           | 10,5     |
| OOS18432.1       | glucokinase                                                      | 4           | 8,2      |
| OOS18802.1       | hypothetical protein B0686_02295                                 | 4           | 20,9     |
| OOS18900.1       | ATP-dependent 6-phosphofructokinase                              | 4           | 10,1     |
| OOS18916.1       | foldase PrsA                                                     | 4           | 14,1     |
| OOS19246.1       | cell division protein FtsA                                       | 4           | 13,5     |
| OOS16426.1       | PspC family transcriptional regulator                            | 3           | 6,4      |
| OOS16837.1       | peptidoglycan-binding protein LysM                               | 3           | 13,5     |
| OOS17467.1       | peptide ABC transporter ATP-binding protein                      | 3           | 7,7      |
| OOS17906.1       | recombinase RecA                                                 | 3           | 8,6      |
| OOS18104.1       | CHAP domain-containing protein                                   | 3           | 10,6     |
| OOS19027.1       | ribose-5-phosphate isomerase                                     | 3           | 26,3     |
| OOS19047.1       | hypothetical protein B0686_03595                                 | 3           | 9,5      |
| OOS19049.1       | efflux transporter periplasmic adaptor subunit                   | 3           | 16,0     |
| OOS19312.1       | general stress protein                                           | 3           | 18,8     |
| OOS16470.1       | choline-binding protein C                                        | 2           | 5,5      |
| OOS16549.1       | GntR family transcriptional regulator                            | 2           | 6,7      |
| OOS16883.1       | coat protein                                                     | 2           | 10,6     |
| OOS16918.1       | protein jag                                                      | 2           | 4,3      |
| OOS17413.1       | hydrolase                                                        | 2           | 12,6     |
| OOS17415.1       | PTS mannose family transporter subunit IID                       | 2           | 8,6      |
| OOS17417.1       | PTS mannose transporter subunit IIAB                             | 2           | 9,3      |
| OOS17433.1       | peptide ABC transporter ATP-binding protein                      | 2           | 4,6      |
| OOS17576.1       | choline-binding protein A                                        | 2           | 8,9      |
| OOS17671.1       | serine/threonine protein kinase                                  | 2           | 6,2      |
| OOS17672.1       | protein phosphatase                                              | 2           | 11,4     |
| OOS17772.1       | [acyl-carrier-protein] S-malonyltransferase                      | 2           | 10,1     |
| OOS17813.1       | cell division protein GpsB                                       | 2           | 34,5     |
| OOS17869.1       | sodium ABC transporter permease                                  | 2           | 6,5      |

|            |                                                    |   |      |
|------------|----------------------------------------------------|---|------|
| OOS18428.1 | zinc metalloprotease                               | 2 | 1,8  |
| OOS18486.1 | acetoin utilization protein                        | 2 | 11,5 |
| OOS18502.1 | NADPH-dependent FMN reductase                      | 2 | 10,4 |
| OOS18563.1 | hypothetical protein B0686_00985                   | 2 | 0,8  |
| OOS18801.1 | hypothetical protein B0686_02290                   | 2 | 11,1 |
| OOS18823.1 | bacteriocin ABC transporter ATP-binding protein    | 2 | 6,2  |
| OOS18898.1 | L-lactate dehydrogenase                            | 2 | 5,2  |
| OOS18951.1 | alanine dehydrogenase                              | 2 | 8,4  |
| OOS19240.1 | cell division protein DivIVA                       | 2 | 10,0 |
| OOS19243.1 | cell division protein SepF                         | 2 | 19,8 |
| OOS19261.1 | sugar ABC transporter substrate-binding protein    | 2 | 4,1  |
| OOS19298.1 | acetoin reductase                                  | 2 | 9,1  |
| OOS16266.1 | NADPH-dependent FMN reductase                      | 1 | 7,1  |
| OOS16434.1 | choline-binding protein C                          | 1 | 3,6  |
| OOS16482.1 | potassium transporter Trk                          | 1 | 8,1  |
| OOS16511.1 | aspartate--tRNA ligase                             | 1 | 2,2  |
| OOS16518.1 | sugar ABC transporter substrate-binding protein    | 1 | 3,8  |
|            | 2,3,4,5-tetrahydropyridine-2,6-dicarboxylate N-    |   |      |
| OOS16528.1 | acetyltransferase                                  | 1 | 7,3  |
| OOS16535.1 | arginine--tRNA ligase                              | 1 | 1,8  |
| OOS16890.1 | hypothetical protein B0686_09475                   | 1 | 8,2  |
| OOS16915.1 | acetate kinase                                     | 1 | 5,1  |
| OOS16921.1 | L-ribulose-5-phosphate 4-epimerase                 | 1 | 5,5  |
| OOS16944.1 | B-cell receptor associated protein-related protein | 1 | 7,1  |
| OOS17426.1 | catabolite control protein A                       | 1 | 4,2  |
| OOS17435.1 | hydrolase TatD                                     | 1 | 6,6  |
| OOS17437.1 | hypothetical protein B0686_08390                   | 1 | 14,1 |
| OOS17444.1 | pur operon repressor                               | 1 | 5,8  |
| OOS17468.1 | peptide ABC transporter permease                   | 1 | 3,4  |
| OOS17480.1 | non-canonical purine NTP pyrophosphatase           | 1 | 5,0  |
| OOS17493.1 | endo-beta-N-acetylglucosaminidase                  | 1 | 1,1  |
| OOS17648.1 | polyribonucleotide nucleotidyltransferase          | 1 | 1,2  |
| OOS17696.1 | accessory Sec system glycosyltransferase GtfA      | 1 | 3,8  |
| OOS17761.1 | membrane protease                                  | 1 | 4,8  |
| OOS17776.1 | MarR family transcriptional regulator              | 1 | 7,6  |
| OOS17777.1 | enoyl-CoA hydratase                                | 1 | 5,7  |
| OOS17789.1 | molecular chaperone DnaJ                           | 1 | 5,3  |
| OOS17812.1 | RNA methyltransferase                              | 1 | 3,9  |
| OOS17817.1 | peptide ABC transporter ATP-binding protein        | 1 | 2,1  |
| OOS17823.1 | capsular biosynthesis protein                      | 1 | 3,6  |
| OOS17828.1 | hypothetical protein B0686_05730                   | 1 | 3,7  |
| OOS17833.1 | tyrosine protein kinase                            | 1 | 5,6  |
| OOS17834.1 | capsular biosynthesis protein CpsC                 | 1 | 9,1  |
| OOS17837.1 | peptide ABC transporter ATP-binding protein        | 1 | 2,3  |
| OOS17896.1 | hypothetical protein B0686_06090                   | 1 | 2,9  |
| OOS17907.1 | competence/damage-inducible protein A              | 1 | 3,6  |
| OOS17919.1 | proline--tRNA ligase                               | 1 | 2,8  |
| OOS17971.1 | GNAT family acetyltransferase                      | 1 | 8,3  |
| OOS17974.1 | damage-inducible protein CinA                      | 1 | 3,1  |
| OOS17997.1 | ABC transporter permease                           | 1 | 10,9 |

|            |                                                          |   |      |
|------------|----------------------------------------------------------|---|------|
|            | tRNA (adenosine(37)-N6)-threonylcarbamoyltransferase     |   |      |
| OOS18017.1 | complex dimerization subunit type 1 TsaB                 | 1 | 4,8  |
| OOS18041.1 | hypothetical protein B0686_06875                         | 1 | 3,7  |
| OOS18069.1 | glycerol kinase                                          | 1 | 3,4  |
| OOS18096.1 | DHH family phosphoesterase                               | 1 | 2,1  |
| OOS18100.1 | YigZ family protein                                      | 1 | 6,2  |
| OOS18106.1 | rod shape-determining protein MreC                       | 1 | 5,5  |
| OOS18128.1 | chromosomal replication initiation protein DnaA          | 1 | 2,6  |
| OOS18139.1 | cell division protein FtsH                               | 1 | 2,6  |
| OOS18389.1 | mucus-binding protein                                    | 1 | 0,9  |
| OOS18400.1 | CsbD family protein                                      | 1 | 23,8 |
| OOS18413.1 | transcription elongation factor GreA                     | 1 | 11,9 |
| OOS18431.1 | calcium-binding protein                                  | 1 | 8,3  |
| OOS18442.1 | DNA-binding response regulator                           | 1 | 4,5  |
| OOS18490.1 | cell division protein FtsX                               | 1 | 7,8  |
| OOS18491.1 | PTS glucose/maltose transporter subunit IIBCA            | 1 | 2,5  |
| OOS18499.1 | glycine--tRNA ligase subunit beta                        | 1 | 2,4  |
| OOS18519.1 | haloacid dehalogenase                                    | 1 | 6,2  |
| OOS18541.1 | proteinase                                               | 1 | 5,0  |
| OOS18545.1 | GMP synthetase                                           | 1 | 1,9  |
| OOS18551.1 | FOF1 ATP synthase subunit delta                          | 1 | 6,2  |
| OOS18566.1 | aminoacyl-tRNA deacylase                                 | 1 | 6,9  |
|            | bifunctional pyr operon transcriptional regulator/uracil |   |      |
| OOS18619.1 | phosphoribosyltransferase                                | 1 | 8,7  |
| OOS18621.1 | carbamoyl phosphate synthase small subunit               | 1 | 3,6  |
| OOS18623.1 | phosphorylcholine transferase LicD                       | 1 | 6,3  |
| OOS18642.1 | endonuclease                                             | 1 | 2,4  |
| OOS18652.1 | amino acid ABC transporter permease                      | 1 | 2,6  |
| OOS18673.1 | adenylate cyclase                                        | 1 | 6,9  |
| OOS18682.1 | thiol reductase thioredoxin                              | 1 | 16,5 |
| OOS18688.1 | type I pullulanase                                       | 1 | 1,4  |
| OOS18689.1 | 1,4-alpha-glucan branching enzyme                        | 1 | 3,6  |
| OOS18694.1 | glycerate kinase                                         | 1 | 3,5  |
| OOS18706.1 | thioredoxin                                              | 1 | 7,4  |
| OOS18713.1 | mechanosensitive ion channel protein MscL                | 1 | 17,5 |
| OOS18805.1 | hypothetical protein B0686_02310                         | 1 | 21,4 |
| OOS18820.1 | LytTR family transcriptional regulator                   | 1 | 10,0 |
| OOS18822.1 | ATPase                                                   | 1 | 3,2  |
| OOS18830.1 | bacteriocin immunity protein                             | 1 | 10,1 |
| OOS18852.1 | dihydroxyacetone kinase subunit DhaK                     | 1 | 4,3  |
| OOS18870.1 | galactose-6-phosphate isomerase                          | 1 | 9,2  |
| OOS18961.1 | dTMP kinase                                              | 1 | 7,1  |
| OOS18977.1 | D-alanyl-D-alanine carboxypeptidase                      | 1 | 3,9  |
| OOS18988.1 | peptide ABC transporter ATP-binding protein              | 1 | 2,3  |
| OOS19011.1 | NAD-dependent protein deacylase                          | 1 | 6,6  |
| OOS19017.1 | ribose 5-phosphate isomerase A                           | 1 | 4,4  |
| OOS19025.1 | ATP-dependent Clp protease ATP-binding subunit           | 1 | 3,7  |
| OOS19032.1 | DJ-1 family protein                                      | 1 | 9,2  |
| OOS19093.1 | adaptor protein MecA                                     | 1 | 5,7  |
| OOS19105.1 | hypothetical protein B0686_03925                         | 1 | 6,3  |

|            |                                          |   |      |
|------------|------------------------------------------|---|------|
| OOS19106.1 | hypothetical protein B0686_03930         | 1 | 9,8  |
| OOS19134.1 | phosphate-binding protein                | 1 | 4,5  |
| OOS19142.1 | diacylglyceryl transferase               | 1 | 14,0 |
| OOS19192.1 | 30S ribosomal protein S15                | 1 | 10,4 |
| OOS19244.1 | YggS family pyridoxal phosphate enzyme   | 1 | 5,4  |
| OOS19249.1 | D-alanine--D-alanine ligase A            | 1 | 2,9  |
| OOS19255.1 | hypothetical protein B0686_04775         | 1 | 5,4  |
| OOS19268.1 | acetylxyln esterase                      | 1 | 3,7  |
| OOS19273.1 | alanine racemase                         | 1 | 4,1  |
| OOS19276.1 | 3-deoxy-7-phosphoheptulonate synthase    | 1 | 3,2  |
| OOS19277.1 | preprotein translocase subunit SecA      | 1 | 2,4  |
| OOS19341.1 | MarR family transcriptional regulator    | 1 | 8,2  |
| OOS19373.1 | acyl-[acyl-carrier-protein] thioesterase | 1 | 4,1  |
| OOS19375.1 | hypothetical protein B0686_04205         | 1 | 6,3  |
