# Supplementary material for: Proteotyping bacteria: Characterization, differentiation and identification of pneumococcus and other species within the Mitis Group of the genus Streptococcus by tandem mass spectrometry proteomics
Source: PubMed Central journal article supplement (PMC6287849; doi:10.1371/journal.pone.0208804), 2018-12-10
Supplement: pone.0208804.s009.pdf [file pone.0208804.s009.pdf]

**S9 Table.****List of proteins identified by species-unique peptides in analysis of *S. mitis* CCUG 69183 (SK271)**

| Accession number | Description                                             | Nº peptides | Coverage |
|------------------|---------------------------------------------------------|-------------|----------|
| KER08226.1       | LPXTG-motif cell wall anchor domain protein             | 54          | 41,3     |
| KER08229.1       | pneumococcal surface protein A                          | 22          | 38,2     |
| KER07351.1       | LPXTG-motif cell wall anchor domain protein             | 15          | 8,1      |
| KER08215.1       | cell wall binding repeat family protein                 | 10          | 23,1     |
| KER07353.1       | LPXTG-motif cell wall anchor domain protein             | 9           | 3,4      |
| KER08228.1       | pneumococcal surface protein A                          | 9           | 24,2     |
| KER07595.1       | putative pullulanase                                    | 8           | 8,9      |
| KER08664.1       | LPXTG-motif cell wall anchor domain protein             | 8           | 2,7      |
| KER07313.1       | LPXTG-motif cell wall anchor domain protein             | 7           | 6,0      |
| KER08350.1       | cell division protein FtsZ                              | 6           | 21,3     |
| KER07242.1       | LPXTG-motif cell wall anchor domain protein             | 5           | 7,4      |
| KER07776.1       | hypothetical protein SK271_1842                         | 5           | 12,6     |
| KER08424.1       | lysM domain protein                                     | 5           | 6,8      |
| KER08647.1       | PPIC-type PPIASE domain protein                         | 5           | 18,9     |
| KER07318.1       | LPXTG-motif cell wall anchor domain protein             | 4           | 1,9      |
| KER07352.1       | LPXTG-motif cell wall anchor domain protein             | 4           | 3,0      |
| KER08227.1       | cell wall binding repeat family protein                 | 4           | 7,9      |
| KER07719.1       | putative membrane protein                               | 3           | 11,6     |
| KER07941.1       | response regulator                                      | 3           | 6,8      |
| KER08055.1       | oligopeptide-binding protein sarA                       | 3           | 5,8      |
| KER08352.1       | hypothetical protein SK271_0393                         | 3           | 20,9     |
| KER08355.1       | divIVA domain protein                                   | 3           | 21,0     |
| KER08548.1       | septation ring formation regulator, EzrA family protein | 3           | 6,4      |
| KER08946.1       | R3H domain protein                                      | 3           | 8,8      |
| KER07312.1       | LPXTG-motif cell wall anchor domain protein             | 2           | 1,8      |
| KER07363.1       | putative NAD(P)H nitroreductase                         | 2           | 6,0      |
| KER07412.1       | DNA-directed RNA polymerase, omega subunit              | 2           | 14,4     |
| KER07547.1       | ABC-2 transporter family protein                        | 2           | 6,6      |
| KER07676.1       | succinyl-diaminopimelate desuccinylase                  | 2           | 10,7     |
| KER07784.1       | CHAP domain protein                                     | 2           | 5,2      |
| KER08106.1       | glycine--tRNA ligase, beta subunit                      | 2           | 4,6      |
| KER08120.1       | CBS domain protein                                      | 2           | 11,5     |
| KER08125.1       | receptor ligand binding region family protein           | 2           | 6,0      |
| KER08182.1       | cysteine-rich secretory family protein                  | 2           | 5,5      |
| KER08275.1       | response regulator                                      | 2           | 14,4     |
| KER08298.1       | diacetyl reductase                                      | 2           | 5,1      |
| KER08349.1       | cell division protein FtsA                              | 2           | 9,8      |
| KER08550.1       | hypothetical protein SK271_0593                         | 2           | 13,1     |
| KER08815.1       | oligopeptide-binding protein AmiA                       | 2           | 3,9      |
| KER08845.1       | endo-beta-N-acetylglucosaminidase D                     | 2           | 1,3      |
| KER07216.1       | maltose/maltodextrin-binding protein                    | 1           | 3,8      |
| KER07244.1       | trkA-N domain protein                                   | 1           | 5,9      |
| KER07271.1       | hypothetical protein SK271_1337                         | 1           | 1,5      |
| KER07317.1       | hypothetical protein SK271_1383                         | 1           | 7,2      |
| KER07346.1       | 1,4-beta-N-acetylmuramidase                             | 1           | 2,6      |
| KER07408.1       | serine/threonine protein phosphatase Stp1               | 1           | 0,4      |
| KER07414.1       | ribonuclease Y                                          | 1           | 2,4      |

|            |                                                                     |   |      |
|------------|---------------------------------------------------------------------|---|------|
| KER07417.1 | hypothetical protein SK271_1483                                     | 1 | 8,5  |
| KER07443.1 | malonyl CoA-acyl carrier protein transacylase                       | 1 | 5,5  |
| KER07448.1 | enoyl-CoA hydratase/isomerase family protein                        | 1 | 5,7  |
| KER07475.1 | cell cycle protein gpsB                                             | 1 | 24,8 |
| KER07485.1 | hypothetical protein SK271_1551                                     | 1 | 3,6  |
| KER07496.1 | polysaccharide export, MPA1 family protein                          | 1 | 7,0  |
| KER07499.1 | bacterial extracellular solute-binding s, 5 Middle family protein   | 1 | 2,3  |
| KER07503.1 | putative ATP-dependent Clp protease ATP-binding subunit             | 1 | 2,3  |
| KER07574.1 | hypothetical protein SK271_1640                                     | 1 | 2,2  |
| KER07586.1 | protein RecA                                                        | 1 | 3,9  |
| KER07651.1 | acetyltransferase family protein                                    | 1 | 8,3  |
| KER07782.1 | translation elongation factor Ts                                    | 1 | 4,6  |
| KER07853.1 | HAD hydrolase, IIB family protein                                   | 1 | 6,3  |
| KER07891.1 | serine hydroxymethyltransferase family protein                      | 1 | 3,1  |
| KER07904.1 | large conductance mechanosensitive channel protein                  | 1 | 17,5 |
| KER07917.1 | riboflavin biosynthesis protein RibF                                | 1 | 4,3  |
| KER07988.1 | 3-isopropylmalate dehydrogenase                                     | 1 | 3,8  |
| KER07999.1 | phosphotransferase enzyme family protein                            | 1 | 3,8  |
| KER08004.1 | licD family protein                                                 | 1 | 6,3  |
| KER08086.1 | bacterial capsule synthesis PGA_cap family protein                  | 1 | 3,4  |
| KER08103.1 | NADPH-dependent FMN reductase family protein                        | 1 | 4,5  |
| KER08108.1 | glutathione-dependent formaldehyde-activating enzyme family protein | 1 | 21,9 |
| KER08116.1 | PTS system, glucose subfamily, IIA component domain protein         | 1 | 2,5  |
| KER08154.1 | hydroxyethylthiazole kinase                                         | 1 | 7,3  |
| KER08164.1 | POTRA domain, FtsQ-type family protein                              | 1 | 3,1  |
| KER08324.1 | 3-deoxy-7-phosphoheptulonate synthase                               | 1 | 3,2  |
| KER08344.1 | penicillin-binding protein 2B                                       | 1 | 2,0  |
| KER08406.1 | 30S ribosomal protein S15                                           | 1 | 10,4 |
| KER08412.1 | pfkB carbohydrate kinase family protein                             | 1 | 4,3  |
| KER08477.1 | 3-dehydroquinone dehydratase                                        | 1 | 5,5  |
| KER08480.1 | chorismate synthase                                                 | 1 | 3,4  |
| KER08482.1 | hypothetical protein SK271_0525                                     | 1 | 9,8  |
| KER08526.1 | efflux transporter, RND family, MFP subunit                         | 1 | 5,0  |
| KER08528.1 | ftsX-like permease family protein                                   | 1 | 5,1  |
| KER08583.1 | bacterial extracellular solute-binding s, 5 Middle family protein   | 1 | 2,3  |
| KER08594.1 | D-alanyl-D-alanine carboxypeptidase                                 | 1 | 3,9  |
| KER08682.1 | arginine repressor                                                  | 1 | 9,1  |
| KER08699.1 | lactose phosphotransferase system repressor                         | 1 | 3,5  |
| KER08781.1 | catabolite control protein A                                        | 1 | 4,2  |
| KER08783.1 | HAD hydrolase, IIB family protein                                   | 1 | 2,5  |
| KER08788.1 | bacterial extracellular solute-binding s, 5 Middle family protein   | 1 | 2,3  |
| KER08806.1 | aspartate--ammonia ligase                                           | 1 | 3,0  |
| KER08809.1 | lon protease (S16) C-terminal proteolytic domain protein            | 1 | 5,8  |

|            |                                    |   |     |
|------------|------------------------------------|---|-----|
| KER08841.1 | UDP-glucose 4-epimerase            | 1 | 3,9 |
| KER08870.1 | thioredoxin family protein         | 1 | 2,6 |
| KER08890.1 | translation initiation factor IF-2 | 1 | 2,0 |
| KER08925.1 | lysM domain protein                | 1 | 3,3 |
