# Supplementary material for: Proteotyping bacteria: Characterization, differentiation and identification of pneumococcus and other species within the Mitis Group of the genus Streptococcus by tandem mass spectrometry proteomics
Source: PubMed Central journal article supplement (PMC6287849; doi:10.1371/journal.pone.0208804), 2018-12-10
Supplement: pone.0208804.s010.pdf [file pone.0208804.s010.pdf]

**S10 Table.****List of proteins identified by species-unique peptides in analysis of *S. pseudopneumoniae* CCUG 49455T**

| Accession number | Description                                             | Nº peptides | Coverage |
|------------------|---------------------------------------------------------|-------------|----------|
| ORC37164.1       | cell wall-binding protein, partial                      | 43          | 47,9     |
| ORC38886.1       | choline-binding protein                                 | 21          | 54,3     |
| ORC39808.1       | hypothetical protein B4W83_06435, partial               | 18          | 35,7     |
| ORC40644.1       | hypothetical protein B4W83_04385, partial               | 16          | 20,4     |
| ORC39803.1       | secretion protein                                       | 15          | 36,6     |
| ORC40058.1       | hypothetical protein B4W83_05940, partial               | 14          | 27,5     |
| ORC41371.1       | peptidase M26                                           | 14          | 8,5      |
| ORC39560.1       | hypothetical protein B4W83_07325, partial               | 8           | 38,7     |
| ORC42535.1       | peptidase, partial                                      | 7           | 7,7      |
| ORC36032.1       | peptidase, partial                                      | 6           | 11,6     |
| ORC36825.1       | YSIRK signal domain/LPXTG anchor domain surface protein | 6           | 6,4      |
| ORC42021.1       | hypothetical protein B4W83_01405                        | 6           | 16,9     |
| ORC35201.1       | hypothetical protein B4W83_11775, partial               | 5           | 10,8     |
| ORC36031.1       | hypothetical protein B4W83_11525                        | 3           | 1,3      |
| ORC36014.1       | alpha-glycerophosphate oxidase                          | 3           | 6,9      |
| ORC39780.1       | hypothetical protein B4W83_06530                        | 3           | 5,1      |
| ORC39539.1       | AAA family ATPase                                       | 3           | 8,3      |
| ORC39626.1       | 30S ribosomal protein S1                                | 3           | 4,0      |
| ORC38895.1       | choline-binding protein C                               | 2           | 6,9      |
| ORC40501.1       | transposase                                             | 2           | 8,1      |
| ORC41944.1       | pullulanase                                             | 2           | 3,3      |
| ORC34791.1       | growth inhibitor PemK                                   | 2           | 9,8      |
| ORC39603.1       | hemolysin                                               | 2           | 2,9      |
| ORC38998.1       | sugar ABC transporter substrate-binding protein         | 2           | 6,1      |
| ORC40049.1       | catabolite control protein A                            | 2           | 7,4      |
| ORC42007.1       | 50S ribosomal protein L3                                | 2           | 8,7      |
| ORC40377.1       | cell division protein SepF                              | 2           | 16,2     |
| ORC41209.1       | 6-phospho-beta-glucosidase                              | 2           | 6,1      |
| ORC41496.1       | site-specific DNA-methyltransferase                     | 1           | 2,6      |
| ORC39414.1       | protein jag                                             | 1           | 4,0      |
| ORC39417.1       | acetate kinase                                          | 1           | 3,8      |
| ORC37105.1       | tagatose 1,6-diphosphate aldolase                       | 1           | 4,3      |
| ORC36026.1       | SPFH domain-containing protein                          | 1           | 3,0      |
| ORC36181.1       | DNA-directed RNA polymerase subunit beta <sup>1</sup>   | 1           | 0,8      |
| ORC37108.1       | galactose-6-phosphate isomerase subunit LacA            | 1           | 7,8      |
| ORC39776.1       | hypothetical protein B4W83_06490                        | 1           | 8,5      |
| ORC36179.1       | DNA-directed RNA polymerase subunit beta                | 1           | 1,6      |
| ORC40508.1       | bacteriocin ABC transporter ATP-binding protein         | 1           | 2,4      |
| ORC41249.1       | foldase PrsA                                            | 1           | 3,5      |
| ORC36797.1       | alanine--tRNA ligase                                    | 1           | 1,5      |
| ORC41690.1       | phosphoglucosamine mutase                               | 1           | 3,3      |
| ORC42020.1       | dehydrogenase                                           | 1           | 4,3      |
| ORC39960.1       | ribonuclease Y                                          | 1           | 1,9      |
| ORC39593.1       | ATP-dependent Clp protease ATP-binding subunit          | 1           | 1,6      |
| ORC41645.1       | ATP synthase FO subunit B                               | 1           | 7,3      |
| ORC41943.1       | thiol-activated cytolysin                               | 1           | 2,3      |

|            |                                                                                                                                            |   |      |
|------------|--------------------------------------------------------------------------------------------------------------------------------------------|---|------|
| ORC35202.1 | hypothetical protein B4W83_11780                                                                                                           | 1 | 5,3  |
| ORC41216.1 | serine hydroxymethyltransferase                                                                                                            | 1 | 3,1  |
| ORC40884.1 | sucrose-6-phosphate hydrolase                                                                                                              | 1 | 3,1  |
| ORC41631.1 | phosphoglucomutase                                                                                                                         | 1 | 3,0  |
| ORC41992.1 | 50S ribosomal protein L6                                                                                                                   | 1 | 7,9  |
| ORC41959.1 | proline--tRNA ligase                                                                                                                       | 1 | 2,8  |
| ORC42553.1 | pyruvate oxidase                                                                                                                           | 1 | 2,4  |
| ORC41665.1 | manganese-dependent inorganic pyrophosphatase                                                                                              | 1 | 6,4  |
| ORC34580.1 | restriction endonuclease, partial                                                                                                          | 1 | 6,3  |
| ORC38991.1 | tyrosine--tRNA ligase                                                                                                                      | 1 | 3,3  |
| ORC37089.1 | dihydroxyacetone kinase subunit DhaK                                                                                                       | 1 | 4,3  |
| ORC39639.1 | PTS fructose transporter subunit IIC                                                                                                       | 1 | 2,9  |
| ORC37163.1 | hypothetical protein B4W83_10270, partial                                                                                                  | 1 | 7,9  |
| ORC39488.1 | FRG domain-containing protein                                                                                                              | 1 | 4,0  |
| ORC42538.1 | L-lactate oxidase                                                                                                                          | 1 | 4,5  |
| ORC42022.1 | hypothetical protein B4W83_01410                                                                                                           | 1 | 5,7  |
| ORC41389.1 | lactococcin 972 family bacteriocin                                                                                                         | 1 | 12,2 |
| ORC42502.1 | hypothetical protein B4W83_00565                                                                                                           | 1 | 9,8  |
| ORC40053.1 | universal stress protein UspA                                                                                                              | 1 | 15,3 |
| ORC41659.1 | peptide ABC transporter ATP-binding protein                                                                                                | 1 | 2,3  |
| ORC35836.1 | IS1634 family transposase                                                                                                                  | 1 | 2,1  |
| ORC38937.1 | GntR family transcriptional regulator                                                                                                      | 1 | 5,2  |
| ORC41928.1 | aminopeptidase                                                                                                                             | 1 | 2,3  |
| ORC36817.1 | phosphate-binding protein                                                                                                                  | 1 | 4,1  |
| ORC40999.1 | MarR family transcriptional regulator                                                                                                      | 1 | 10,4 |
| ORC42517.1 | multidrug ABC transporter ATP-binding protein<br>bifunctional N-acetylglucosamine-1-phosphate<br>uridyltransferase/glucosamine-1-phosphate | 1 | 2,4  |
| ORC41244.1 | acetyltransferase                                                                                                                          | 1 | 2,6  |
| ORC41480.1 | propanediol utilization protein                                                                                                            | 1 | 9,9  |
| ORC40670.1 | DNA-binding response regulator                                                                                                             | 1 | 6,0  |
| ORC38577.1 | RNA-binding transcriptional accessory protein                                                                                              | 1 | 3,0  |
| ORC38011.1 | phosphorylcholine transferase LicD                                                                                                         | 1 | 6,3  |
| ORC41394.1 | cell division protein DivIB                                                                                                                | 1 | 4,7  |
| ORC40025.1 | GTP-sensing pleiotropic transcriptional regulator CodY                                                                                     | 1 | 6,1  |
| ORC37463.1 | hypothetical protein B4W83_10170                                                                                                           | 1 | 3,1  |
