# Supplementary material for: Proteotyping bacteria: Characterization, differentiation and identification of pneumococcus and other species within the Mitis Group of the genus Streptococcus by tandem mass spectrometry proteomics
Source: PubMed Central journal article supplement (PMC6287849; doi:10.1371/journal.pone.0208804), 2018-12-10
Supplement: pone.0208804.s011.pdf [file pone.0208804.s011.pdf]

**S11 Table.****List of proteins identified by species-unique peptides in analysis of *S. pseudopneumoniae* CCUG 62647**

| Accession number | Description                                        | Nº peptides | Coverage |
|------------------|----------------------------------------------------|-------------|----------|
| OOR79191.1       | cell wall-binding protein, partial                 | 27          | 35,3     |
| OOR84059.1       | choline-binding protein                            | 20          | 42,3     |
| OOR85723.1       | hypothetical protein B0177_00115, partial          | 16          | 34,3     |
| OOR84336.1       | peptidase M26                                      | 13          | 9,3      |
| OOR81496.1       | hypothetical protein B0177_08140, partial          | 12          | 44,7     |
| OOR80376.1       | peptidase                                          | 11          | 9,6      |
| OOR81490.1       | secretion protein                                  | 10          | 29,2     |
| OOR81829.1       | hypothetical protein B0177_07365                   | 5           | 8,8      |
| OOR81958.1       | hypothetical protein B0177_06775                   | 5           | 15,7     |
| OOR83686.1       | hypothetical protein B0177_02640, partial          | 5           | 7,3      |
| OOR79078.1       | hemolysin                                          | 4           | 6,9      |
| OOR79405.1       | alpha-glycerophosphate oxidase                     | 4           | 7,1      |
| OOR81957.1       | hypothetical protein B0177_06770                   | 4           | 14,7     |
| OOR82036.1       | pullulanase                                        | 4           | 7,0      |
| OOR83042.1       | catabolite control protein A                       | 4           | 10,7     |
| OOR81959.1       | dehydrogenase                                      | 3           | 13,9     |
| OOR82037.1       | thiol-activated cytolysin                          | 3           | 4,5      |
| OOR81825.1       | hypothetical protein B0177_07325                   | 2           | 24,6     |
| OOR81973.1       | 50S ribosomal protein L3                           | 2           | 8,7      |
| OOR82171.1       | pyruvate oxidase                                   | 2           | 4,7      |
| OOR83544.1       | peptide ABC transporter ATP-binding protein        | 2           | 5,1      |
| OOR84308.1       | lysine--tRNA ligase                                | 2           | 3,2      |
| OOR85073.1       | hypothetical protein B0177_00560                   | 2           | 18,2     |
| OOR85206.1       | foldase PrsA                                       | 2           | 6,1      |
| OOR85742.1       | AAA family ATPase                                  | 2           | 7,6      |
| OOR78195.1       | hypothetical protein B0177_11640, partial          | 1           | 16,3     |
| OOR78926.1       | DNA-directed RNA polymerase subunit beta           | 1           | 1,6      |
| OOR79025.1       | choline-binding protein                            | 1           | 3,2      |
| OOR79042.1       | 1-phosphofructokinase                              | 1           | 4,6      |
| OOR79055.1       | 30S ribosomal protein S1                           | 1           | 2,5      |
| OOR79129.1       | hypothetical protein B0177_10505                   | 1           | 3,1      |
| OOR79418.1       | beta-galactosidase                                 | 1           | 1,0      |
| OOR79423.1       | hypothetical protein B0177_10235                   | 1           | 0,6      |
| OOR79424.1       | peptidase, partial                                 | 1           | 3,0      |
| OOR79501.1       | ABC transporter                                    | 1           | 5,2      |
| OOR79705.1       | potassium-transporting ATPase subunit C            | 1           | 8,3      |
| OOR79716.1       | phosphoglucomutase                                 | 1           | 3,0      |
| OOR79727.1       | ATP synthase subunit alpha                         | 1           | 3,8      |
| OOR79729.1       | ATP synthase F0 subunit B                          | 1           | 7,3      |
| OOR80498.1       | FRG domain-containing protein                      | 1           | 4,0      |
| OOR80503.1       | Fic/DOC family protein                             | 1           | 3,8      |
| OOR80894.1       | GMP synthetase                                     | 1           | 1,9      |
| OOR81236.1       | hypothetical protein B0177_08175                   | 1           | 10,8     |
| OOR81256.1       | phosphate-binding protein                          | 1           | 4,1      |
| OOR81715.1       | ribonucleoside-diphosphate reductase subunit alpha | 1           | 1,9      |
| OOR81771.1       | CHAP domain-containing protein                     | 1           | 3,1      |
| OOR81835.1       | phosphoglycolate phosphatase                       | 1           | 4,8      |

|            |                                                 |   |      |
|------------|-------------------------------------------------|---|------|
| OOR81924.1 | ABC transporter permease                        | 1 | 10,7 |
| OOR82115.1 | efflux transporter periplasmic adaptor subunit  | 1 | 4,3  |
| OOR82186.1 | L-lactate oxidase                               | 1 | 4,5  |
| OOR82191.1 | mannose-6-phosphate isomerase, class I          | 1 | 6,1  |
| OOR82226.1 | serine/threonine protein kinase                 | 1 | 2,4  |
| OOR82232.1 | sucrose-6-phosphate hydrolase                   | 1 | 3,1  |
| OOR82287.1 | ATP-dependent Clp protease ATP-binding subunit  | 1 | 1,6  |
| OOR82513.1 | tRNA (adenine-N(1))-methyltransferase           | 1 | 7,6  |
| OOR82545.1 | cell division protein SepF                      | 1 | 15,6 |
| OOR82564.1 | sugar ABC transporter substrate-binding protein | 1 | 2,3  |
| OOR82565.1 | PTS glucose transporter subunit IIBC            | 1 | 3,4  |
| OOR82583.1 | preprotein translocase subunit SecA             | 1 | 1,3  |
| OOR82682.1 | helicase BlpT                                   | 1 | 10,3 |
| OOR82689.1 | molecular chaperone DnaK                        | 1 | 1,8  |
| OOR82694.1 | restriction endonuclease subunit R              | 1 | 1,4  |
| OOR82770.1 | hypothetical protein B0177_04075                | 1 | 8,0  |
| OOR83096.1 | ribonuclease Y                                  | 1 | 1,9  |
| OOR83547.1 | CsbD family protein                             | 1 | 21,9 |
| OOR83598.1 | transcriptional repressor CodY                  | 1 | 6,1  |
| OOR83692.1 | arginine repressor                              | 1 | 11,9 |
| OOR83714.1 | DNA-binding response regulator                  | 1 | 6,0  |
| OOR83761.1 | DNA protecting protein DprA                     | 1 | 5,6  |
| OOR84337.1 | TIGR01440 family protein                        | 1 | 7,7  |
| OOR84807.1 | sugar ABC transporter substrate-binding protein | 1 | 3,3  |
| OOR84815.1 | tyrosine--tRNA ligase                           | 1 | 3,3  |
| OOR84853.1 | acetate kinase                                  | 1 | 3,8  |
| OOR84856.1 | protein jag                                     | 1 | 4,0  |
| OOR84874.1 | permease                                        | 1 | 4,6  |
| OOR85049.1 | starch synthase                                 | 1 | 3,6  |
| OOR85121.1 | hypothetical protein B0177_00820                | 1 | 31,1 |
| OOR85143.1 | hypothetical protein B0177_00940                | 1 | 4,2  |
| OOR85173.1 | serine hydroxymethyltransferase                 | 1 | 3,1  |
