# Supplementary material for: Proteotyping bacteria: Characterization, differentiation and identification of pneumococcus and other species within the Mitis Group of the genus Streptococcus by tandem mass spectrometry proteomics
Source: PubMed Central journal article supplement (PMC6287849; doi:10.1371/journal.pone.0208804), 2018-12-10
Supplement: pone.0208804.s012.pdf [file pone.0208804.s012.pdf]

**S12 Table.****List of proteins identified by species-unique peptides in analysis of *S. pseudopneumoniae* CCUG 63747**

| Accession number | Description                                             | Nº peptides | Coverage |
|------------------|---------------------------------------------------------|-------------|----------|
| OOR81280.1       | hypothetical protein B0178_10245, partial               | 30          | 21,3     |
| OOR78974.1       | hypothetical protein B0178_11945                        | 22          | 29,7     |
| OOR83641.1       | choline-binding protein                                 | 17          | 42,3     |
| OOR86110.1       | hypothetical protein B0178_04610                        | 15          | 12,2     |
| OOR86154.1       | peptidase M26                                           | 15          | 8,5      |
| OOR85830.1       | secretion protein                                       | 12          | 27,6     |
| OOR83161.1       | hypothetical protein B0178_08355, partial               | 9           | 74,8     |
| OOR85824.1       | hypothetical protein B0178_05325, partial               | 8           | 50,7     |
| OOR85877.1       | hypothetical protein B0178_05310, partial               | 6           | 19,9     |
| OOR86918.1       | hypothetical protein B0178_00525                        | 5           | 15,9     |
| OOR80748.1       | alpha-glycerophosphate oxidase                          | 4           | 7,1      |
| OOR85899.1       | hypothetical protein B0178_05190                        | 4           | 8,8      |
| OOR86243.1       | hypothetical protein B0178_03410, partial               | 4           | 7,4      |
| OOR81272.1       | catabolite control protein A                            | 3           | 7,7      |
| OOR85903.1       | hypothetical protein B0178_05230                        | 3           | 33,8     |
| OOR86338.1       | YSIRK signal domain/LPXTG anchor domain surface protein | 3           | 3,3      |
| OOR86838.1       | thiol-activated cytolysin                               | 3           | 4,5      |
| OOR86917.1       | dehydrogenase                                           | 3           | 19,6     |
| OOR86919.1       | hypothetical protein B0178_00530                        | 3           | 8,4      |
| OOR82457.1       | peptide ABC transporter ATP-binding protein             | 2           | 5,1      |
| OOR83139.1       | AAA family ATPase                                       | 2           | 7,2      |
| OOR83160.1       | hypothetical protein B0178_08350, partial               | 2           | 11,3     |
| OOR83642.1       | choline-binding protein C                               | 2           | 6,9      |
| OOR85011.1       | CHAP domain-containing protein                          | 2           | 6,4      |
| OOR86079.1       | cell division protein SepF                              | 2           | 16,2     |
| OOR86139.1       | beta-galactosidase                                      | 2           | 1,3      |
| OOR86379.1       | hypothetical protein B0178_02025                        | 2           | 18,2     |
| OOR86475.1       | 6-phospho-beta-glucosidase                              | 2           | 6,1      |
| OOR86516.1       | foldase PrsA                                            | 2           | 6,1      |
| OOR86760.1       | pyruvate oxidase                                        | 2           | 4,7      |
| OOR86839.1       | pullulanase                                             | 2           | 3,3      |
| OOR86903.1       | 50S ribosomal protein L3                                | 2           | 8,7      |
| OOR79007.1       | peptide ABC transporter ATP-binding protein             | 1           | 2,6      |
| OOR79186.1       | ATP-dependent Clp protease ATP-binding subunit          | 1           | 1,6      |
| OOR80082.1       | DNA-directed RNA polymerase subunit beta                | 1           | 1,6      |
| OOR80390.1       | GMP synthetase                                          | 1           | 1,9      |
| OOR80762.1       | hypothetical protein B0178_10835, partial               | 1           | 18,7     |
| OOR81511.1       | ABC transporter                                         | 1           | 5,2      |
| OOR81799.1       | serine/threonine protein kinase                         | 1           | 2,4      |
| OOR81810.1       | sodium ABC transporter permease                         | 1           | 4,0      |
| OOR81872.1       | tyrosine--tRNA ligase                                   | 1           | 3,3      |
| OOR82428.1       | phosphoglucomutase                                      | 1           | 3,0      |
| OOR82440.1       | ATP synthase subunit alpha                              | 1           | 3,8      |
| OOR82442.1       | ATP synthase FO subunit B                               | 1           | 7,3      |
| OOR82460.1       | CsbD family protein                                     | 1           | 21,9     |
| OOR82463.1       | manganese-dependent inorganic pyrophosphatase           | 1           | 6,4      |
| OOR82476.1       | NAD(P)H-dependent oxidoreductase                        | 1           | 7,1      |

|            |                                                 |   |      |
|------------|-------------------------------------------------|---|------|
| OOR83788.1 | acetate kinase                                  | 1 | 3,8  |
| OOR83791.1 | protein jag                                     | 1 | 4,0  |
| OOR83807.1 | permease                                        | 1 | 4,6  |
| OOR84437.1 | exodeoxyribonuclease VII large subunit          | 1 | 3,1  |
| OOR84745.1 | Fic/DOC family protein                          | 1 | 3,8  |
| OOR84949.1 | dihydroxyacetone kinase subunit DhaK            | 1 | 4,3  |
| OOR84968.1 | ribonuclease Y                                  | 1 | 1,9  |
| OOR85693.1 | haloacid dehalogenase                           | 1 | 5,6  |
| OOR85797.1 | MarR family transcriptional regulator           | 1 | 10,4 |
| OOR85930.1 | restriction endonuclease subunit R              | 1 | 1,4  |
| OOR86039.1 | preprotein translocase subunit SecA             | 1 | 1,3  |
| OOR86060.1 | sugar ABC transporter substrate-binding protein | 1 | 2,3  |
| OOR86135.1 | transcriptional repressor CodY                  | 1 | 6,1  |
| OOR86153.1 | TIGR01440 family protein                        | 1 | 7,7  |
| OOR86182.1 | lysine--tRNA ligase                             | 1 | 3,2  |
| OOR86187.1 | potassium-transporting ATPase subunit C         | 1 | 8,3  |
| OOR86230.1 | glycine--tRNA ligase subunit beta               | 1 | 2,4  |
| OOR86330.1 | phosphate-binding protein                       | 1 | 4,1  |
| OOR86426.1 | hypothetical protein B0178_02270                | 1 | 4,2  |
| OOR86428.1 | hypothetical protein B0178_02280, partial       | 1 | 31,5 |
| OOR86482.1 | serine hydroxymethyltransferase                 | 1 | 3,1  |
| OOR86888.1 | 50S ribosomal protein L6                        | 1 | 10,7 |
