# Supplementary material for: Proteotyping bacteria: Characterization, differentiation and identification of pneumococcus and other species within the Mitis Group of the genus Streptococcus by tandem mass spectrometry proteomics
Source: PubMed Central journal article supplement (PMC6287849; doi:10.1371/journal.pone.0208804), 2018-12-10
Supplement: pone.0208804.s013.pdf [file pone.0208804.s013.pdf]

**S13 Table. Number of peptide matches for S2 Figure, showing the species assignments using the Initial vs the Curated Databases**

| PEPTIDE MATCHES DATABASE CURATED |                      |           |            |                            |            |            |                 |            |            |                    |            |            |
|----------------------------------|----------------------|-----------|------------|----------------------------|------------|------------|-----------------|------------|------------|--------------------|------------|------------|
|                                  | <i>S. pneumoniae</i> |           |            | <i>S. pseudopneumoniae</i> |            |            | <i>S. mitis</i> |            |            | <i>S. pyogenes</i> |            |            |
|                                  | CCUG 28588T          | CCUG 7206 | CCUG 35180 | CCUG 49455T                | CCUG 63747 | CCUG 62647 | CCUG 31611T     | CCUG 63687 | CCUG 69183 | CCUG 4207T         | CCUG 25570 | CCUG 47803 |
| <i>S. pneumoniae</i>             | 220                  | 175       | 214        |                            |            |            |                 |            |            |                    |            |            |
| <i>S. pseudopneumoniae</i>       |                      |           |            | 433                        | 245        | 250        |                 |            |            |                    |            |            |
| <i>S. mitis</i>                  |                      |           |            |                            |            | 7          | 272             | 287        | 500        |                    |            |            |
| <i>S. pyogenes</i>               |                      |           |            |                            |            |            |                 |            |            | 314                | 351        | 418        |
| <i>S. suis</i>                   | 7                    |           |            |                            |            |            |                 |            | 6          |                    |            |            |

| PEPTIDE MATCHES DATABASE INITIAL |                      |           |            |                            |            |            |                 |            |            |                    |            |            |
|----------------------------------|----------------------|-----------|------------|----------------------------|------------|------------|-----------------|------------|------------|--------------------|------------|------------|
|                                  | <i>S. pneumoniae</i> |           |            | <i>S. pseudopneumoniae</i> |            |            | <i>S. mitis</i> |            |            | <i>S. pyogenes</i> |            |            |
|                                  | CCUG 28588T          | CCUG 7206 | CCUG 35180 | CCUG 49455T                | CCUG 63747 | CCUG 62647 | CCUG 31611T     | CCUG 63687 | CCUG 69183 | CCUG 4207T         | CCUG 25570 | CCUG 47803 |
| <i>S. pneumoniae</i>             | 347                  | 286       | 380        | 74                         | 26         | 30         | 34              | 21         | 35         |                    |            |            |
| <i>S. pseudopneumoniae</i>       |                      |           |            | 230                        | 183        | 189        | 21              | 17         | 37         |                    |            |            |
| <i>S. mitis</i>                  |                      |           |            | 18                         |            | 11         | 272             | 144        | 134        |                    |            |            |
| <i>S. pyogenes</i>               |                      |           |            |                            |            |            |                 |            |            | 319                | 360        | 427        |
| <i>S. suis</i>                   | 7                    |           |            |                            |            |            |                 |            | 6          |                    |            |            |
| <i>S. oralis</i>                 |                      |           |            | 7                          | 5          |            | 16              | 12         |            |                    |            |            |
| <i>S. parasanguinis</i>          |                      |           |            |                            | 18         |            |                 |            |            |                    |            |            |
| <i>B. proteoclasticus</i>        |                      |           |            |                            |            |            | 34              | 7          | 15         |                    |            |            |
